1

2

3

4 **Chromosome Integrity is Required for the Initiation of Meiotic Sex**

5 **Chromosome Inactivation in *Caenorhabditis elegans***

6 Yisrael Rappaport<sup>1</sup>, Hanna Achache<sup>1</sup>, Roni Falk<sup>1</sup>, Omer Murik<sup>2</sup>, Oren Ram<sup>3</sup>,

7 Yonatan B. Tzur<sup>1, 4</sup>

8

9 <sup>1</sup> Department of Genetics, The Institute of Life Sciences, The Hebrew

10 University of Jerusalem, Jerusalem 91904, Israel

11 <sup>2</sup> Medical Genetics Institute, Shaare Zedek Medical Center, Jerusalem, Israel

12 <sup>3</sup> Department of Biological Chemistry, The Institute of Life Sciences, The

13 Hebrew University of Jerusalem, Jerusalem, Israel.

14

15

16

17

18 <sup>4</sup>Contact: [tzur@mail.huji.ac.il](mailto:tzur@mail.huji.ac.il); Phone: +972-2-658-5442; Fax: +972-2-658-

19 6975

20 **Keywords:** Meiosis, MSCI, meiotic sex chromosome inactivation, germline.

21 **Running Title:** Initiation of MSCI depends on chromosome integrity

22 **During meiosis of heterogametic cells, such as XY meocytes, sex**  
23 **chromosomes of many species undergo transcriptional silencing known as**  
24 **meiotic sex chromosome inactivation (MSCI). Silencing also occurs in**  
25 **aberrantly unsynapsed autosomal chromatin. The silencing of unsynapsed**  
26 **chromatin, is assumed to be the underline mechanism for MSCI. Initiation of**  
27 **MSCI is disrupted in meocytes with sex chromosome-autosome translocations.**  
28 **Whether this is due to aberrant synapsis or the lack of sex chromosome integrity**  
29 **has never been determined. To address this, we used CRISPR to engineer**  
30 ***Caenorhabditis elegans* stable strains with broken X chromosomes that didn't**  
31 **undergo translocations with autosomes. In early meiotic nuclei of these**  
32 **mutants, the X fragments lack silent chromatin modifications and instead the**  
33 **fragments are enriched with transcribing chromatin modifications. Moreover,**  
34 **the level of active RNA polymerase II staining on the X fragments in mutant**  
35 **nuclei is similar to that on autosomes, indicating active transcription on the X.**  
36 **Contrary to previous models, which predicted that any unsynapsed chromatin**  
37 **is silenced during meiosis, X fragments that did not synapse were robustly**  
38 **stained with RNA polymerase II and gene expression levels were high**  
39 **throughout the broken X. Therefore, lack of synapsis does not trigger MSCI if**  
40 **sex chromosome integrity is lost. Moreover, our results suggest that a unique**  
41 **character of the chromatin of sex chromosomes underlies their lack of meiotic**  
42 **silencing due to both unsynapsed chromatin and sex chromosome mechanisms**  
43 **when their integrity is lost.**

44

45 During prophase I of meiosis in most sexually reproducing organisms,  
46 homologous chromosomes pair and then undergo a closer engagement known  
47 as synapsis to complete interhomolog crossover recombination<sup>1-12</sup>. In the  
48 heterogametic cells of many species (e.g., meocytes with X and Y

49 chromosomes), the sex chromosomes pair but undergo synapsis and  
50 crossovers only in the pseudo homology regions. In mouse testes, these paired  
51 chromosomes form a compartment of heterochromatic chromatin referred to as  
52 the XY body, which undergoes transcriptional silencing through many stages of  
53 meiosis and, in some cases, into gametogenesis. Although sex chromosomes  
54 have appeared and disappeared several times during metazoan evolution,  
55 meiotic sex chromosomes inactivation (MSCI) occurs in many species from  
56 worms to humans <sup>13-17</sup>.

57 MSCI in mammals is perturbed by mutations in genes involved in meiotic  
58 double-strand break formation (e.g., *Spo11*), DNA damage response (e.g.,  
59 *Brca1*, *Mdc1*, *Topbp1*, and *Setx* <sup>18-22</sup>), and chromatin modifiers (e.g., *Setdb1*  
60 <sup>23</sup>). In mouse testes, the lack of MSCI usually leads to pachytene arrest,  
61 apoptosis, and persistence of homologous recombination intermediates <sup>24, 25</sup>.  
62 Although the molecular mechanism of MSCI emplacement is well  
63 characterized, our knowledge of how MSCI is triggered is lacking.

64 In the nematode *C. elegans*, MSCI is present in both XO male and XX  
65 hermaphrodite worms. In gonads of adult worms, nuclei are arranged according  
66 to developmental progression. At the distal end, proliferative cells undergo  
67 mitotic divisions, and they enter meiosis at the leptotene/zygotene stage, where  
68 homologous chromosomes pair. Pairing is closely followed by synapsis within  
69 an evolutionary conserved structure involving lateral and central proteinaceous  
70 elements that keep the homologs aligned. The chromosomes are fully  
71 synapsed during pachytene, which allows crossovers to mature. In  
72 hermaphrodite worms, the nuclei proceed through diplotene and reach maturity  
73 at the diakinesis stage <sup>7, 8, 12</sup>. In male worms, the single X chromosome does

74 not undergo synapsis and is transcriptionally silenced throughout meiosis <sup>26-29</sup>.  
75 In hermaphrodites, the two X chromosomes pair and synapse, yet these  
76 chromosomes are silenced in early meiotic stages; toward the end of pachytene  
77 the silencing is relieved, however, and transcription from these chromosomes  
78 increases.

79 The current model views MSCI as a special case of meiotic silencing of  
80 unsynapsed chromatin (MSUC) <sup>30</sup>, a processes characterized in mammals,  
81 *Neurospora crassa*, and *C. elegans* <sup>30-32</sup>. Several lines of evidence support this  
82 model, including the silencing of the unsynapsed X chromosome in XO female  
83 mouse meiocytes <sup>30</sup> and the lack of silencing in synapsed Y chromosomes in  
84 mouse XYY testes <sup>33</sup>. Furthermore, when translocations between autosomes  
85 and sex chromosomes occur, the localization of MSCI effectors to the sex  
86 chromosomes fragments is perturbed <sup>34-37</sup>. This lack of MSCI was explained by  
87 the aberrant synapsis of the sex chromosome fragments observed in these  
88 nuclei. Nevertheless, several reports suggest that, in some cases, synapsed  
89 translocated sex chromosomes show MSCI markers <sup>34-37</sup> raising the possibility  
90 that changes in sex chromosome integrity can perturb MSCI.

91 In this study we tested the hypothesis that sex chromosomes must be  
92 unbroken (hence chromosome integrity) for efficient MSCI. We created stable  
93 worm strains with broken X chromosomes that did not translocate to  
94 autosomes. We found that in meiocytes of these strains, and in a strain with a  
95 reciprocal translocation of chromosomes V and X, MSCI failed to initiate. The  
96 X chromosome segments showed active transcription markers, and the  
97 expression of X-linked genes in the gonads was increased in the strains with  
98 broken X chromosomes. In contrast to the prediction that MSCI is a special

99 case of MSUC, we showed that segments of the X that are unsynapsed are not  
100 silenced. Loss of MSCI was accompanied by meiotic defects, perturbations in  
101 DNA repair, and reduced fertility. Based on these data, we suggest that  
102 chromosome integrity is required in *C. elegans* hermaphrodites for MSCI and  
103 proper meiotic progression.

104

## 105 **Results**

### 106 **Creation of *C. elegans* stable homozygous strains with broken X** 107 **chromosomes**

108 Previous reports indicated that MSCI is disrupted in heterogametic cells with  
109 sex-chromosome to autosome translocations and that, in some cases, gene  
110 expression was uncoupled from the synapsis state of the translocated  
111 chromosomes<sup>30, 34, 35, 37, 38</sup>. This suggested that disruption of chromosome  
112 integrity prevents initiation of MSCI. To test this hypothesis, we aimed to create  
113 worm strains with an X chromosome with disrupted integrity but without a  
114 translocation with an autosome, reducing the possibility of aberrant synapsis.  
115 Ideally, we wanted a system that 1) is homozygous stable, 2) has fragments  
116 considerably smaller than the full-size chromosome but larger than extra-  
117 chromosomal arrays and free duplications, and 3) has fragments with telomeres  
118 on both sides.

119 Previous reports indicate that multiple CRISPR-mediated DNA double-  
120 strand breaks at homologous chromosomal loci can lead to chromosomal  
121 aberrations such as inversions, large deletions, circularizations, and  
122 chromosomal cleavages<sup>39-45</sup>. To create strains with fragmented X

123 chromosomes, we searched for genomic regions near the ends of chromosome  
124 X with homology to regions at the center. If breaks at both at both center and  
125 one of the ends loci are formed, and not repaired, three fragments are created.  
126 If two non-adjacent breaks are ligated, two fragments result. If all three  
127 fragments are ligated, then chromosome rearrangements may occur. A  
128 fragment without telomers could also undergo circularization as was detected  
129 before<sup>39, 46</sup>. We identified a 2.2-kb region (X:16508962-16511217) on the right  
130 side of the X chromosome encompassing the non-coding gene *linc-20*, which  
131 is homologous (>92% identity) to a region near the center of the X chromosome  
132 (X:7769295-7771552) within the fourteenth intron (i14) of *deg-1*. Neither of  
133 these genes have previously been associated with germline roles<sup>47-49</sup>. As  
134 previously described<sup>50, 51</sup>, we directed Cas9 to these loci with four guide RNAs  
135 (gRNAs) to create multiple breaks. We assayed the progeny of injected worms  
136 for deletions in targeted loci using PCR and isolated a strain with small deletions  
137 in both: The deletion in i14 was 2597 bases, and two deletions were observed  
138 in *linc-20* of 1417 and 2721 bases (data not shown). After five outcrosses with  
139 the wild-type strain, the YBT7 strain was established. All further experiments  
140 were conducted using this outcrossed strain. This strain was maintained  
141 through multiple generations without any change in genotyping markers of  
142 these loci.

143 We next evaluated whether there are structural alterations in the X  
144 chromosomes of YBT7 worms using Nanopore long-read DNA sequencing.  
145 This analysis indicated that Cas9-mediated cleavages in i14 of *deg-1* and in  
146 *linc-20* loci resulted in fusion of the internal fragment from X:772344 to  
147 X:16511091 into a circular chromosome of approximately 8.7 Mbp. Additionally,

148 the left fragment was ligated to the right fragment (linking X:7769697 to  
149 X:16513803), creating an approximately 9-Mbp linear chromosome (Fig. 1a  
150 and supplemental data). We also detected a small inversion within the fusion  
151 point of the linear chromosome (X:7762996 to X:16513802). Sanger  
152 sequencing confirmed the fusion points of these fragments. No other major  
153 chromosomal alterations were detected by the Nanopore sequencing.

154 We verified that both the X chromosomes are fragmented in YBT7 by co-  
155 staining YBT7 gonads with antibodies against HIM-8, a protein that binds the  
156 left end of the X chromosome<sup>52</sup>, and with fluorescent in situ hybridization  
157 (FISH) probes directed to a site left of *linc-20* locus (L *linc-20*). In YBT7, HIM-8  
158 is predicted to bind the linear fragment, whereas the FISH probes bind to the  
159 circular fragment (Fig. 1a). In wild-type pachytene nuclei these markers  
160 appeared on the same DAPI-stained track, but in YBT7 the HIM-8 and FISH  
161 staining mostly marked different DAPI tracks (Fig. 1b; 80/80 vs. 10/80 on the  
162 same track, respectively). Due to the spatial resolution of our fluorescent  
163 microscopy two very close tracks are not always differentiated, which is likely  
164 why the two markers scored on the same track in a fraction of YBT7 nuclei  
165 examined. The distance between the markers was also shorter in wild-type  
166 worms than in YBT7 worms (Fig. 1c;  $2.25 \pm 0.08 \mu\text{M}$  vs.  $3.5 \pm 0.1 \mu\text{M}$ ,  
167 respectively,  $n=80$ ). We next co-stained YBT7 gonads with HIM-8 antibodies  
168 and FISH probes directed to the right side of the chromosome (Fig. 1a). The  
169 two markers were on the same DAPI-stained track during pachytene in both  
170 strains, but in YBT7 they were closer than in the wild-type strain (Fig. 1d-e;  
171  $1.1 \pm 0.04 \mu\text{M}$  vs.  $2.3 \pm 0.1 \mu\text{M}$ , respectively,  $n=80$ ), suggesting that the left end  
172 of the X is closer to the right end in YBT7 than in the wild-type strain.

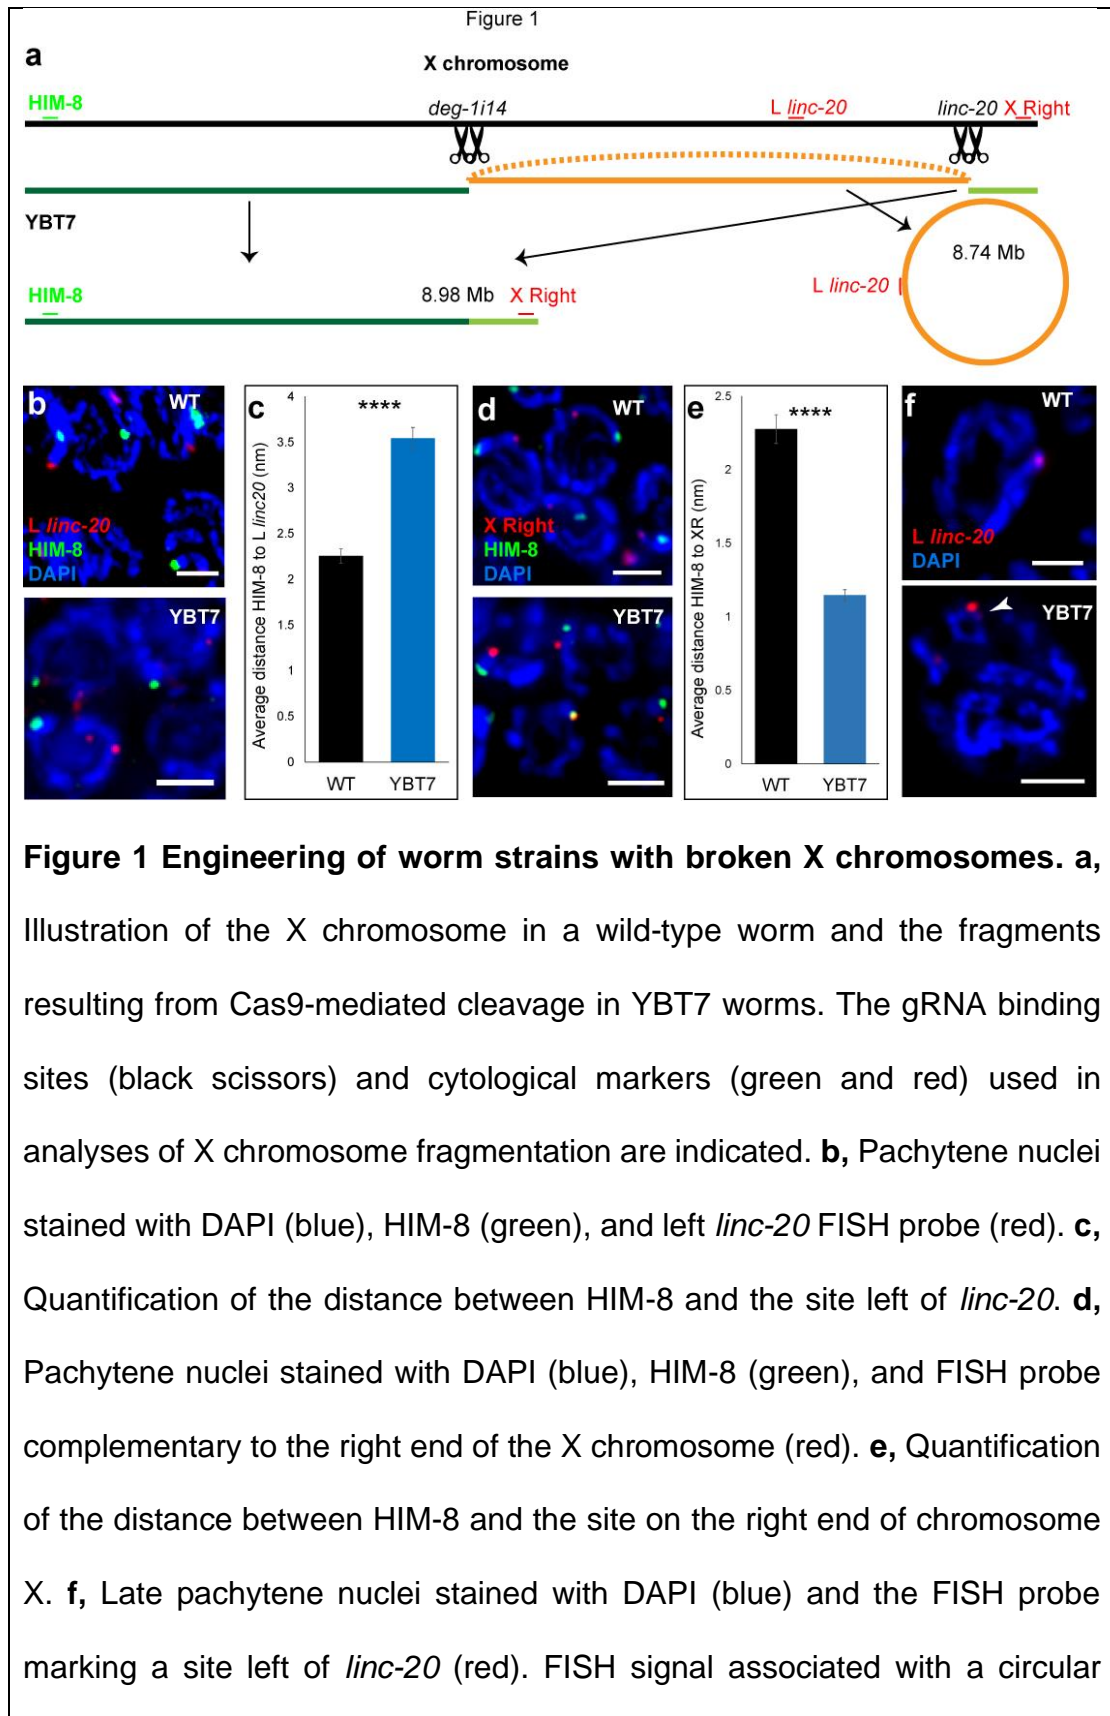



chromosome is marked with an arrowhead.  $n \geq 80$ . \*\*\*\*  $p < 0.0001$ , Mann-Whitney test. Scale bars = 3  $\mu$ M.

173 Circular chromosomes and large extrachromosomal circular DNA are  
174 observed in many organisms in normal and tumor cells, and circular  
175 chromosomes can be maintained through multiple mitotic divisions<sup>53</sup>. In  
176 humans, these chromosomal aberrations are thought to result from two double-  
177 stranded breaks<sup>46</sup>. To verify that the middle segment of the X chromosome  
178 exists as a circle in the YBT7 germline cells, we imaged late pachytene nuclei  
179 marked with the FISH expected to be within the circular fragment (Fig. 1a, the  
180 probe to the left of the *linc-20* locus). In YBT7 but not in wild-type gonads, we  
181 detected nuclei in which this probe was localized to a circular DAPI stained  
182 track (Fig. 1f). Taken together, these analyses indicate that YBT7 worm cells  
183 have a stably fragmented X chromosome. These worms are homozygous for  
184 two dissociated parts of the X chromosome that are not translocated to  
185 autosomes.

186

### 187 **Loss of MSCI markers in early meiotic nuclei with broken X chromosome**

188 In the gonads of hermaphroditic *C. elegans*, the two X chromosomes are  
189 silenced from the proliferative nuclei until late pachytene, and then transcription  
190 resumes<sup>26-29, 54</sup>. During early meiotic stages, the chromatin of X chromosomes  
191 is enriched with modifications correlated with low transcriptional activity such  
192 as histone H3 trimethylated at lysine 27 (H3K27me3)<sup>55</sup>. We tested whether the  
193 disruption of X chromosome integrity changed the chromatin state by staining  
194 the gonads with H3K27me3 antibodies and with HIM-8 to mark the X

195 chromosome. As shown previously <sup>55</sup>, we found that in early wild-type  
196 pachytene nuclei the X chromosomes were strongly stained with H3K27me3  
197 antibodies (Fig. 2a). In YBT7 early pachytene nuclei, the HIM-8 marked DAPI  
198 track was stained with the H3K27me3 antibody at levels similar to all other DAPI  
199 tracks, and no chromosome was strongly stained (Fig. 2a). We next measured  
200 the level of H3K27me3 signal associated with the HIM-8-marked chromosome  
201 relative to the level associated with the autosomes in the same nucleus. We  
202 found that in wild-type strain the ratio was  $1.5\pm 0.07$ , whereas that in the YBT7  
203 strain was  $1.06\pm 0.03$  (Fig. 2b;  $n\geq 10$ ,  $p<0.01$  by the Mann-Whitney test). Thus,  
204 the linear fragment of the X chromosome in early meiotic YBT7 nuclei was  
205 marked by H3K27me3 at levels very similar to autosomes.

206 We next tested whether transcription from the X chromosome changes  
207 when its integrality is disrupted. For this analysis, we used antibodies to histone  
208 H3 dimethylated at lysine 4 (H3K4me2), a modification correlated with active  
209 transcription in *C. elegans*. In nuclei in early meiotic stages in wild-type gonads,  
210 there are very low levels of H3K4me2 on the X chromosomes <sup>26, 55, 56</sup>. In YBT7  
211 nuclei, however, the staining of the X chromosome fragment was more strongly  
212 stained than in wild-type gonads; the level was similar to that of autosomes (Fig.  
213 2c). Quantification of the staining levels on the HIM-8-marked chromosome vs.  
214 the autosomes within the same nucleus indicated that the ratio was significantly  
215 higher in YBT7 nuclei than in wild-type nuclei (Fig. 2d;  $0.82\pm 0.05$  vs.  $0.46\pm 0.02$ ,  
216 respectively,  $n\geq 15$ ).

217 One of the most direct cytology markers of active transcription is the  
218 antibody that recognizes the B1 subunit of RNA polymerase II (RNAPII) when  
219 phosphorylated at Ser2 <sup>26, 57, 58</sup>. As was observed previously <sup>26</sup>, we found that

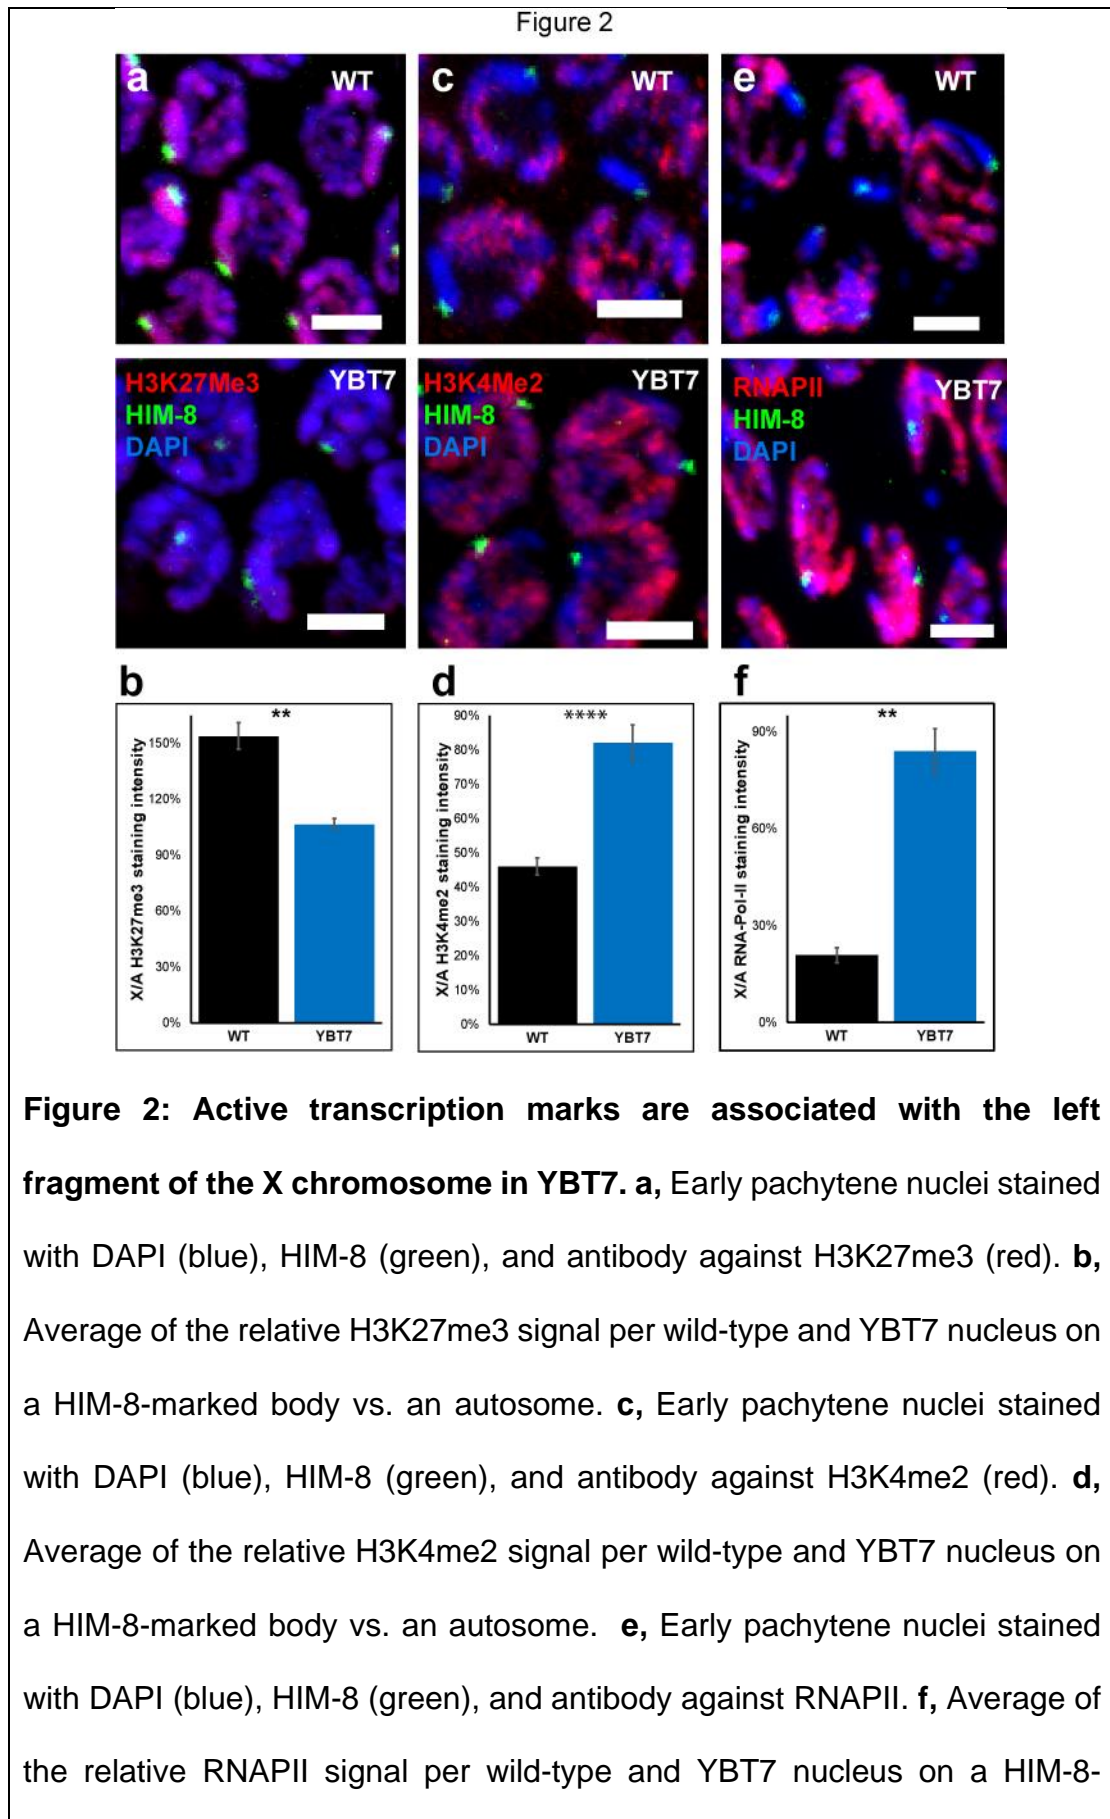

marked body vs. an autosome.  $n \geq 10$ . \*\*  $p < 0.01$ , \*\*\*\*  $p < 0.0001$ , Mann-Whitney test. Scale bar = 3  $\mu$ M.

220 in early pachytene nuclei of wild-type gonads the X chromosome was not  
221 strongly associated with this antibody (Fig. 2e). In contrast, in YBT7 early  
222 pachytene nuclei the chromatin tracks with the HIM-8 mark indicative of the X  
223 chromosome fragment were strongly stained for active RNAPII (Fig. 2e).  
224 Quantification of the ratio of RNAPII signal on the HIM-8 associated  
225 chromosome vs. an autosome within the same nucleus showed a dramatic  
226 difference between wild-type and YBT7 gonads (Fig. 2f;  $0.2 \pm 0.02$  vs.  $0.8 \pm 0.07$ ,  
227 respectively,  $n \geq 11$ ). Taken together these results indicate that in YBT7 nuclei,  
228 the linear fragment of the broken X chromosome is not silenced during early  
229 meiotic steps.

230

### 231 **Many X linked genes are upregulated in YBT7 gonads**

232 Our cytological data suggest that the X chromosome linear fragment in  
233 YBT7 gonads does not undergo meiotic silencing. To determine whether the  
234 circular fragment or specific regions of the linear fragment are transcriptionally  
235 silent, we dissected gonads from wild-type and YBT7 worms and compared  
236 their transcriptomes. We found that 197 genes out of 2867 from the X  
237 chromosome were highly upregulated and 24 were highly downregulated in  
238 YBT7 compared to wild-type gonads (Table S1). Of the highly upregulated  
239 genes, 91 are encoded on the circular fragment and 106 on the linear fragment,  
240 and no specific regions were over- or under-represented (Fig. 3, Table S1). This  
241 is probably an underestimation of the level of upregulated genes since loss of

242 MSCI in hermaphrodites is expected to affect expression only at the distal part  
243 of the gonads, whereas we sequenced RNA from whole gonads. Moreover,  
244 mRNA abundance is higher at the proximal than in the distal side of the gonad  
245 <sup>59</sup>.

246 Among the 24 highly downregulated genes in YBT7 gonads, only two were  
247 on the linear fragment, and 22 on the circular fragment (Fig. 3, Table S1,  $p < 0.01$   
248 by Fisher's exact test). It is possible that one circular chromosome was lost in  
249 some meiocytes, that silencing of the circular fragment occurs only in a fraction  
250 of the meiocytes, or a complex genetic plan affecting these downregulated  
251 genes.

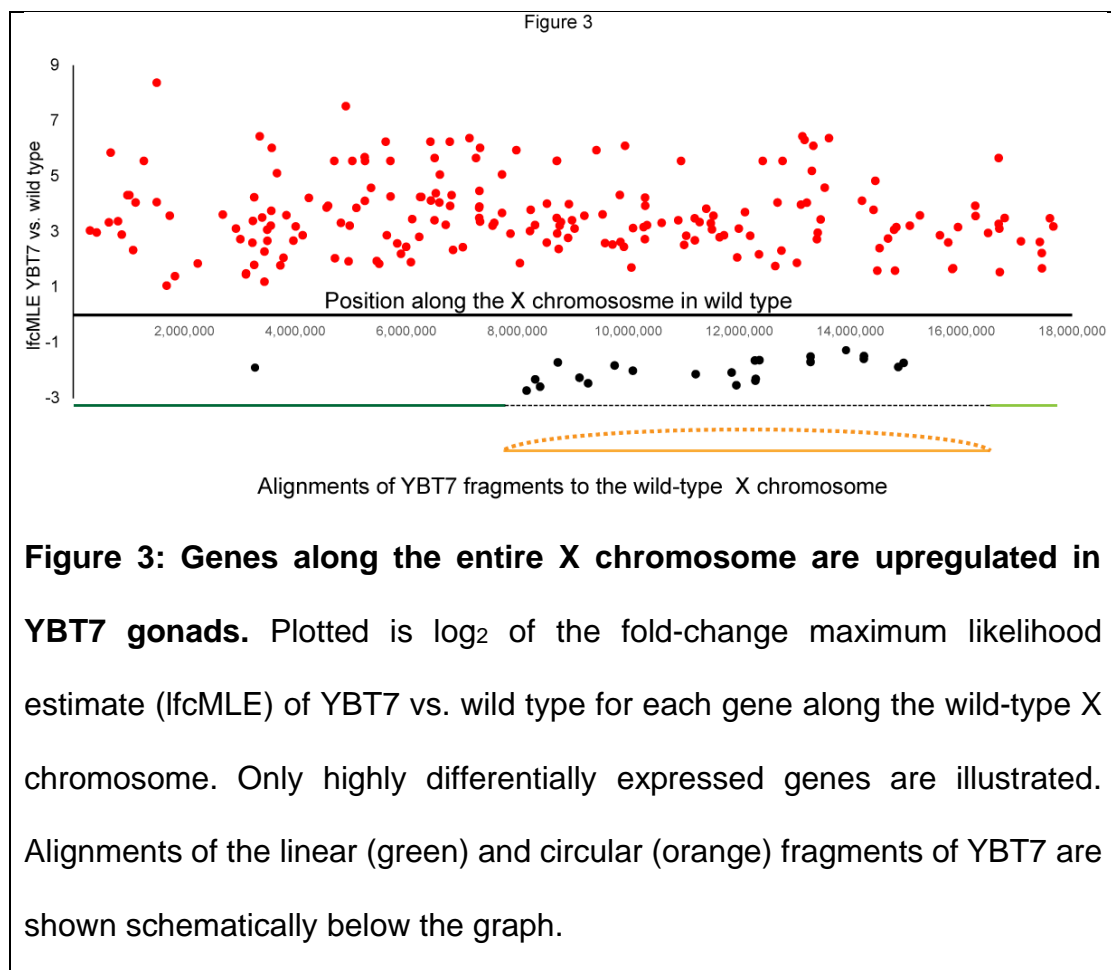

252

253 The dramatic difference we found in expression of genes on the X  
254 chromosome in YBT7 gonads compared to wild-type gonads could be  
255 correlated with differences in autosomal transcription. Indeed, the expression  
256 of 706 autosomal genes was also highly upregulated in YBT7 gonads (Fig. S1,  
257 Table S1). Nevertheless, A higher percentage of genes were upregulated on  
258 the fragmented X chromosome than on autosomes ( $p < 7.29 \times 10^{-17}$  by the  
259 hypergeometric test). The loss of silencing of X-linked genes may lead to  
260 misregulation of autosomal gene expression. However, a specific genetic plan  
261 could not be detected, suggesting a complex mechanism. Taken together these  
262 results indicate that transcription in the YBT7 germline is misregulated, and  
263 many genes from both linear and circular X chromosome fragments are more  
264 highly expressed than are the same genes in wild-type gonads.

265

### 266 **Worms with broken X chromosomes have severe meiotic alterations**

267 The dramatic transcription misregulation observed in YBT7 gonads  
268 suggested that meiosis is likely disrupted in this strain. Indeed, there was a  
269 striking reduction in progeny brood size (Fig. 4a;  $230 \pm 13$  vs.  $70 \pm 17$  per worm  
270 for wild type vs. YBT7, respectively,  $n \geq 17$ ), indicating reduced fertility.  
271 Moreover,  $64 \pm 7\%$  of the embryos laid by YBT7 worms did not hatch (Emb  
272 phenotype), whereas only  $1.3 \pm 0.4$  of wild-type embryos did not hatch (Fig. 4b;  
273  $n \geq 17$ ). This is suggestive of meiotic failure in YBT7 worms that leads to  
274 embryonic lethality. We did not detect a high incidence of males (Him  
275 phenotype), which has also been associated with failed meiotic segregations  
276 <sup>60</sup>.

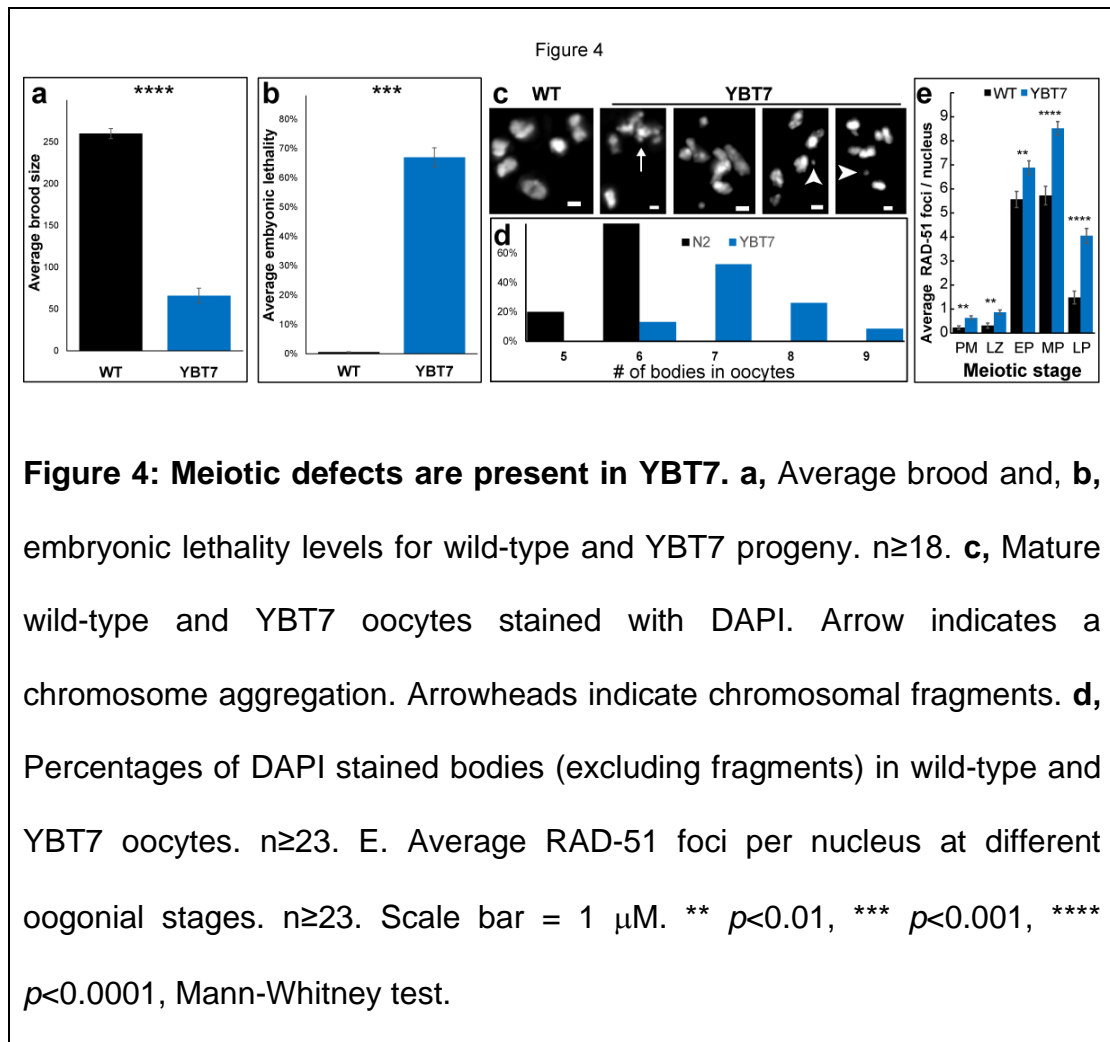

277 To obtain insight into the cellular basis of the embryonic lethality, we  
278 examined DAPI-stained wild-type and YBT7 mature oocytes. Wild-type oocytes  
279 almost always contained six DAPI-stained bodies (Fig. 4c), corresponding to  
280 the six bivalents of *C. elegans*. Many YBT7 oocytes had chromosomal  
281 aggregations, fragments, and univalent-like bodies. The number of DAPI-  
282 stained bodies varied from six to nine (excluding chromosomal fragments and  
283 aggregations, Fig. 4c-d). These chromosomal aberrations could be due to  
284 aberrant repair of DNA double-strand breaks. To test this hypothesis, we  
285 stained wild-type and YBT7 gonads with RAD-51 antibodies, which mark  
286 homologous recombination repair sites<sup>61-63</sup>. In wild-type gonads, we observed  
287 previously described dynamics of RAD-51 foci<sup>61</sup>: The number of foci rose

288 during the leptotene/zygotene stage, reached a maximum during mid-  
289 pachytene, and decreased during late pachytene (Fig. 4e). In YBT7 gonads,  
290 we observed similar dynamics, but the average values in YBT7 gonads were  
291 higher in all stages (Fig. 4e). For example, in mid-pachytene we found  $5.7 \pm 0.4$   
292 foci per nucleus in wild-type gonads, whereas in YBT7 gonads we found  
293  $8.5 \pm 0.3$  ( $n \geq 40$ ). Thus, double-strand break repair is perturbed in the YBT7  
294 strain. In agreement with these results we identified that some YBT7 oocytes  
295 had very small DAPI bodies, characteristic of chromosomal fragments, as well  
296 as chromosome aggregations (Fig. 4c), which are known to be a result of  
297 aberrant DNA double strand break repair<sup>64, 65</sup>. These results suggest that the  
298 X chromosome cleavage we engineered in the YBT7 strain caused  
299 perturbations in double-strand break repair and reduced fertility.

300

301 **The meiotic defects in YBT7 are not the result of the deletions in *deg-1***  
302 **and *linc-20* loci**

303 To fragment the X chromosome, we had to delete regions of the long non-  
304 coding RNA gene, *linc-20*, locus and of an intron of *deg-1*. These deletions  
305 could theoretically be the cause of the meiotic defects we observed in the YBT7  
306 strain. To rule this out, we engineered a gene disruption in *deg-1* (*deg-*  
307 *1(huj28)*). This mutation did not lead to reduced brood size or embryonic  
308 lethality phenotypes (Fig. S2a-b). Similarly, a strain we engineered with a full  
309 deletion of *linc-20* had normal brood size and levels of embryonic lethality (Fig.  
310 S2c-d). These results suggest that the meiotic defects in YBT7 are not the result  
311 of the loss-of-function of either *deg-1* or *linc-20*.



312        Although we did not detect meiotic defects in strains with mutations in *deg-*  
313        *1* or *linc-20* genes, it is possible that the specific deletions we created in those  
314        sites led to the meiotic phenotypes and not the segmentation of the X  
315        chromosome. To interrogate whether the deletions are related to the  
316        phenotypes we observed, we used homology-directed repair CRISPR  
317        engineering<sup>66-74</sup> to create a strain with the three deletions within the *deg-1* and  
318        *linc-20* loci present in YBT7 but without fragmentation of the X chromosome.  
319        Brood size and embryonic lethality of this strain were equivalent to wild type  
320        (Fig. S2e-f). Taken together these results show that the phenotypes of YBT7  
321        are not the result of deletions in the *deg-1* and *linc-20* loci.

322

### 323        **Aberrant MSCI occurs in another strain with a broken X chromosome**

324        To verify that the phenotypes we observed in YBT7 stem from loss of sex  
325        chromosome integrity, we engineered another strain, YBT68, in which the X  
326        chromosome was cleaved into two fragments of roughly equal size. We isolated  
327        a strain with small deletions within i14 of *deg-1* and within the *linc-20* locus.  
328        Nanopore long read sequencing data suggested that the X chromosome is non-  
329        continuous at the *deg-1* locus, but there was no indication of fragmentation at  
330        the *linc-20* locus or of a translocation (Fig. 5a and supplementary data). The  
331        most probable interpretation of these results is that the X was broken at the  
332        *deg-1* locus with some overlap between the right and left sides of the break  
333        (Fig. 5a and supplementary data). In line with this option, staining with HIM-8  
334        antibodies and a FISH probe directed to the right side of the X were present on  
335        the same DAPI stained track in 100% of wild type pachytene nuclei, but only in

336 4% of YBT68 nuclei (Fig. 5b,  $n \geq 17$ ,  $p$  value  $< 0.00001$ , Fisher exact test). The  
337 HIM-8 and FISH foci were spatially further from each other in YBT68 than in  
338 wild type gonads (Fig. 5b-c,  $3.0 \pm 0.1 \mu\text{M}$  vs  $2.3 \pm 0.1 \mu\text{M}$  respectively,  $n \geq 17$ ).  
339 Staining with HIM-8 and a probe directed to the left side of *linc-20* locus showed  
340 similar results (data not shown). Mature YBT68 oocytes stained with DAPI  
341 contained mostly seven bodies (Fig. 5d-e). These data indicate that in the  
342 YBT68 strain, the X chromosome is broken into two fragments.

343 We next sequenced the genomes of the parental wild-type strain, YBT7, and  
344 YBT68 at approximately 100X coverage using Illumina next-generation  
345 sequencing. The sequencing results revealed that there are no off-target  
346 structural alternations or mutations within coding genes shared between these  
347 strains (Table S2).

348 If MSCI initiation is dependent on X chromosome integrity, YBT68 should  
349 have similar phenotypes to YBT7. Indeed, the average brood size of YBT68  
350 worms was significantly smaller than that of the wild-type worms (Fig. 5f), and  
351 there was over 60% embryonic lethality (Fig. 5g). We note that the progeny in  
352 YBT68 is higher than YBT7, and the nature of the chromosomal aberrations in  
353 mature oocytes is different (compare Fig. 4 to Fig. 5). This could stem from the  
354 specific chromosomal outcome of YBT7: the circular chromosome and/or no  
355 telomere-less fragment. This in turn could result in a different change of the  
356 genetic program, that leads to different level of meiotic outcome. We verified  
357 that the meiotic phenotypes present in YBT68 were not a result of the 13-base  
358 pair deletion in *i14* by engineering a strain in which we recreated the wild-type  
359 sequence at the *i14* locus within the YBT68 strain. This repair did not rescue  
360 the brood size or embryonic lethality defects observed in YBT68 (Fig. S2g-h).

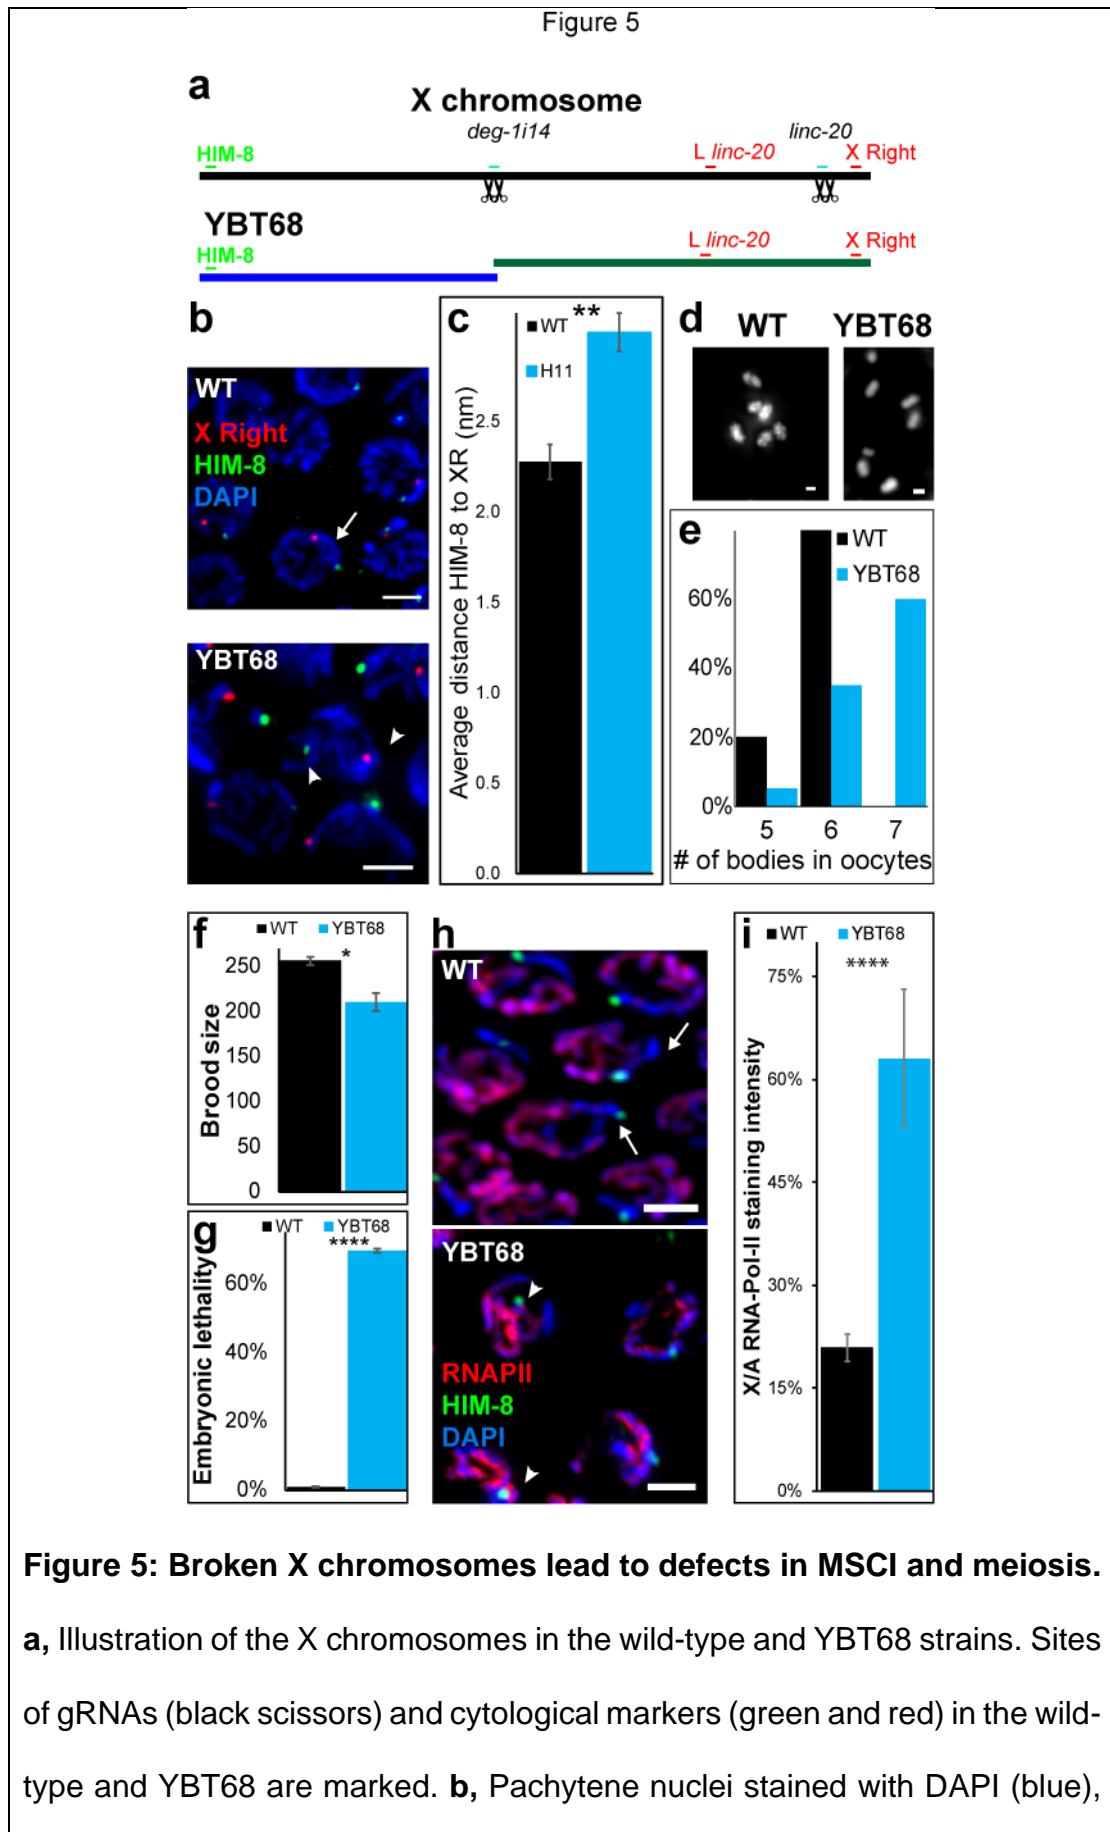

HIM-8 (green), and FISH probe directed to the right end of the X chromosome (red). Arrow indicates hybridization of both probes on the same chromosome. Arrowheads indicate probe hybridization on different chromosomes. Scale bar = 3  $\mu$ M. **c**, Quantification of the distance between HIM-8 and the FISH probe in wild-type and YBT68 pachytene nuclei. **d**, Mature wild-type and YBT68 oocytes stained with DAPI. Scale bar = 1  $\mu$ M. **e**, Distribution of the numbers of DAPI-stained bodies in wild-type and YBT68 oocytes.  $n \geq 10$ . **f**, Average brood size and, **g**, embryonic lethality of wild-type and YBT68 broods. **h**, Early pachytene nuclei from wild-type and YBT68 gonads stained with DAPI (blue), HIM-8 (green), and RNAPII (red). Scale bar = 3  $\mu$ M. Arrows indicate HIM-8-marked chromosome with no RNAPII staining. Arrowheads indicate HIM-8-marked chromosome with significant RNAPII staining. **i**, Average of the relative RNAPII staining levels per wild-type and YBT68 nucleus on the HIM-8-marked body vs. an autosome. \*  $p < 0.05$ , \*\*  $p < 0.01$ , \*\*\*\*  $p < 0.0001$ , Mann-Whitney test.

361       Importantly, the MSCI loss we observed in YBT7 was also observed in the  
362 YBT68 strain. The relative staining of RNAPII on the HIM-8 track was  
363 significantly higher in YBT68 than in wild-type gonads (Fig. 5h-i). These results  
364 show that in both of the strains we engineered to have broken X chromosomes,  
365 there were defects in MSCI.

366

367

368

369 **MSCI is aberrant in a strain with reciprocal translocation of chromosomes**  
370 **V and X**

371 We next sought to test whether MSCI is impaired when the X chromosome  
372 integrity is compromised using a different technology. Herman et al. previously  
373 reported the isolation of SP486, a strain with the mnT10 reciprocal translocation  
374 between chromosomes X and V <sup>75</sup>. Hermaphrodite worms of this strain have a  
375 pair of homologous chromosomes with part of chromosome V fused to part of  
376 the X chromosome and another pair with the reciprocally fused parts. We  
377 stained gonads of SP486 worms with HIM-8 and RNAPII antibodies. Similar to  
378 YBT7 and YBT68, in early pachytene nuclei of SP486 the ratio of RNAPII  
379 staining between the HIM-8 region and the autosomes was significantly higher  
380 than in wild-type gonads (Fig. 6a-b, 130%±20% vs. 58%±3 respectively).

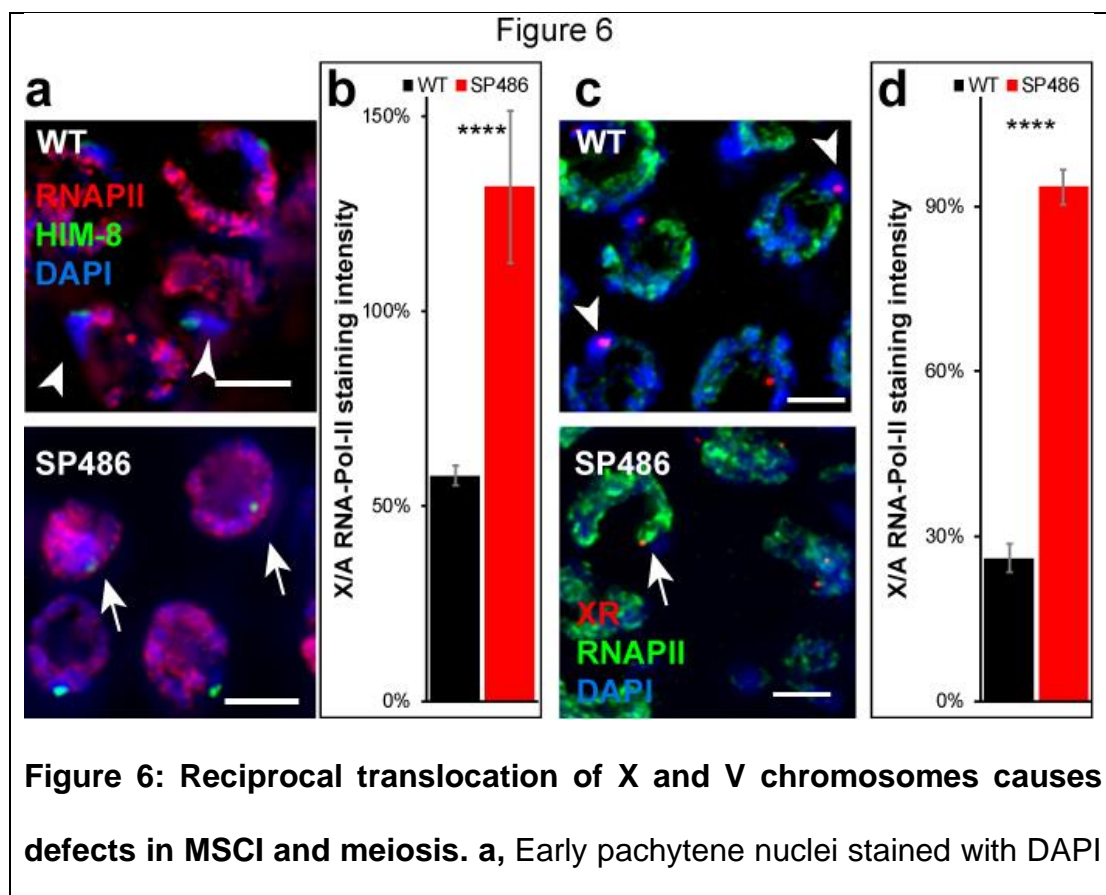

(blue), RNAPII (red), and HIM-8 (green). Scale bar = 3  $\mu$ M. **c**, Early pachytene nuclei stained with DAPI (blue), RNAPII (green), and FISH probe to the right side of the X (red). Scale bar = 3  $\mu$ M. **b, d**, Average of the relative RNAPII on the X segment vs an autosome within the same nucleus of **a** and **c** respectively. Arrows: chromosomes with no RNAPII staining. Arrowheads: chromosomes with significant RNAPII staining. n=20. \*\*\*\*  $p < 0.0001$ , Mann-Whitney test.

381

382 To the best of our knowledge the break sites that led to the translocation in  
383 the SP486 strain have not been fully characterized. It is therefore possible that  
384 the region that binds to HIM-8 is only a small part of the X chromosome and  
385 most of the X was translocated to a different part of chromosome V and was  
386 silenced. To test this possibility, we stained gonads with antibodies against  
387 RNAPII and FISH probes directed to the right side of the X chromosome. In  
388 wild-type early pachytene nuclei, RNAPII staining was very weak on the right  
389 side of the X chromosome compared to that in autosomes (Fig. 6c-d). In SP486  
390 gonads, however, the region stained by the probe directed to the right side of  
391 the X chromosome was stained with RNAPII as strongly as were autosomes  
392 (Fig. 6c-d,  $26\% \pm 3\%$  vs.  $94\% \pm 3\%$  for wild type and SP486, respectively, n=20).  
393 These results indicate that MSCI initiation fails when regions of the X  
394 chromosome are translocated through natural events. Moreover, these results  
395 indicate that MSCI aberrations due to integrity loss are not limited to specific  
396 break sites.

397

398 **Both synapsed and unsynapsed fragments of the X chromosome are**  
399 **actively transcribed in early meiotic stages**

400 The accepted model for MSCI places the trigger for the inactivation in the  
401 unsynapsed region of the sex chromosomes<sup>17</sup>. In hermaphroditic *C. elegans*,  
402 the two X chromosomes synapse, yet undergo MSCI during early oogenesis<sup>26-</sup>  
403 <sup>29, 54</sup>. MSUC also occurs in hermaphroditic worms<sup>32</sup>. If MSUC occurs on the X  
404 chromosome, we expect that unsynapsed segments of the X will undergo  
405 silencing. Alternatively, if unsynapsed segments do not undergo silencing upon  
406 sex chromosome integrity loss, the mechanism must differ from MSUC. Due to  
407 the nature of pairing in *C. elegans* meiosis, which is required for homolog  
408 synapsis, any chromosomal body that harbors a pairing center, pairs and  
409 synapses, whereas bodies without pairing centers often do not synapse<sup>52, 76</sup>.  
410 The linear fragment of YBT7 contains the pairing center and is therefore  
411 expected to pair and synapse, while the circular fragment is expected to stay  
412 unsynapsed. If MSCI is a special case of MSUC, then gene expression should  
413 be silenced on the unsynapsed fragment. Our data, however, indicate that  
414 genes on both the linear and circular fragments of the X chromosome are highly  
415 upregulated in YBT7 (Fig. 3). Therefore, either the circular fragment is  
416 synapsed, or it escapes MSUC.

417 To determine the fate of the circular fragment, we stained gonads with  
418 antibodies directed against the synaptonemal complex central protein SYP-4,  
419 <sup>77</sup> and against active RNAPII. In 100% of wild-type early and mid-pachytene  
420 nuclei we found a DAPI stained body with a SYP-4 track but without significant  
421 RNAPII staining, corresponding to the synapsed and silenced X chromosomes  
422 present in wild-type gonads (Fig. 7). In YBT7 gonads, only 5% of mid-early

423 pachytene nuclei had this type of staining combination ( $p < 0.00001$ , Fisher's  
424 exact test,  $n \geq 42$ ). In 40% of YBT7 early and mid-pachytene nuclei, all the  
425 chromosomes stained with both SYP-4 and RNAPII. These nuclei have either  
426 lost the circular fragment, which does not contain a pairing center, or the circular  
427 fragment was synapsed (Fig. 7c). In 36% of the YBT7 nuclei, we detected  
428 chromosomes stained with RNAPII but not SYP-4 (Fig. 7a-b). These  
429 chromosomes were mostly smaller than other chromosomes (Fig. 7b),  
430 suggesting that they are fragments of the X chromosome. Since the linear  
431 fragment has a pairing center, whereas the circular fragment does not, these  
432 unsynapsed active chromosomes are probably the circular fragment. To  
433 specifically identify these unsynapsed active chromosomes as the circular  
434 fragment, a FISH marker must be added to this staining combination, yet so far  
435 we have been unable to make all four stains work simultaneously and  
436 reproducibly in the same gonad. Together, these results indicate that in the  
437 majority of nuclei from YBT7 gonads, the X fragments were not silenced  
438 regardless of whether or not they were synapsed. The presence of the  
439 chromosomes that were stained robustly with RNAPII but not SYP-4 show that  
440 loss of X chromosome integrity can lead to loss of MSUC. Furthermore, our  
441 data suggest that asynapsis of parts of the X do not necessarily lead to  
442 silencing. Our findings support the hypothesis that loss of sex chromosome  
443 integrity can prevent both meiotic silencing and silencing of unsynapsed  
444 chromatin.

445

446



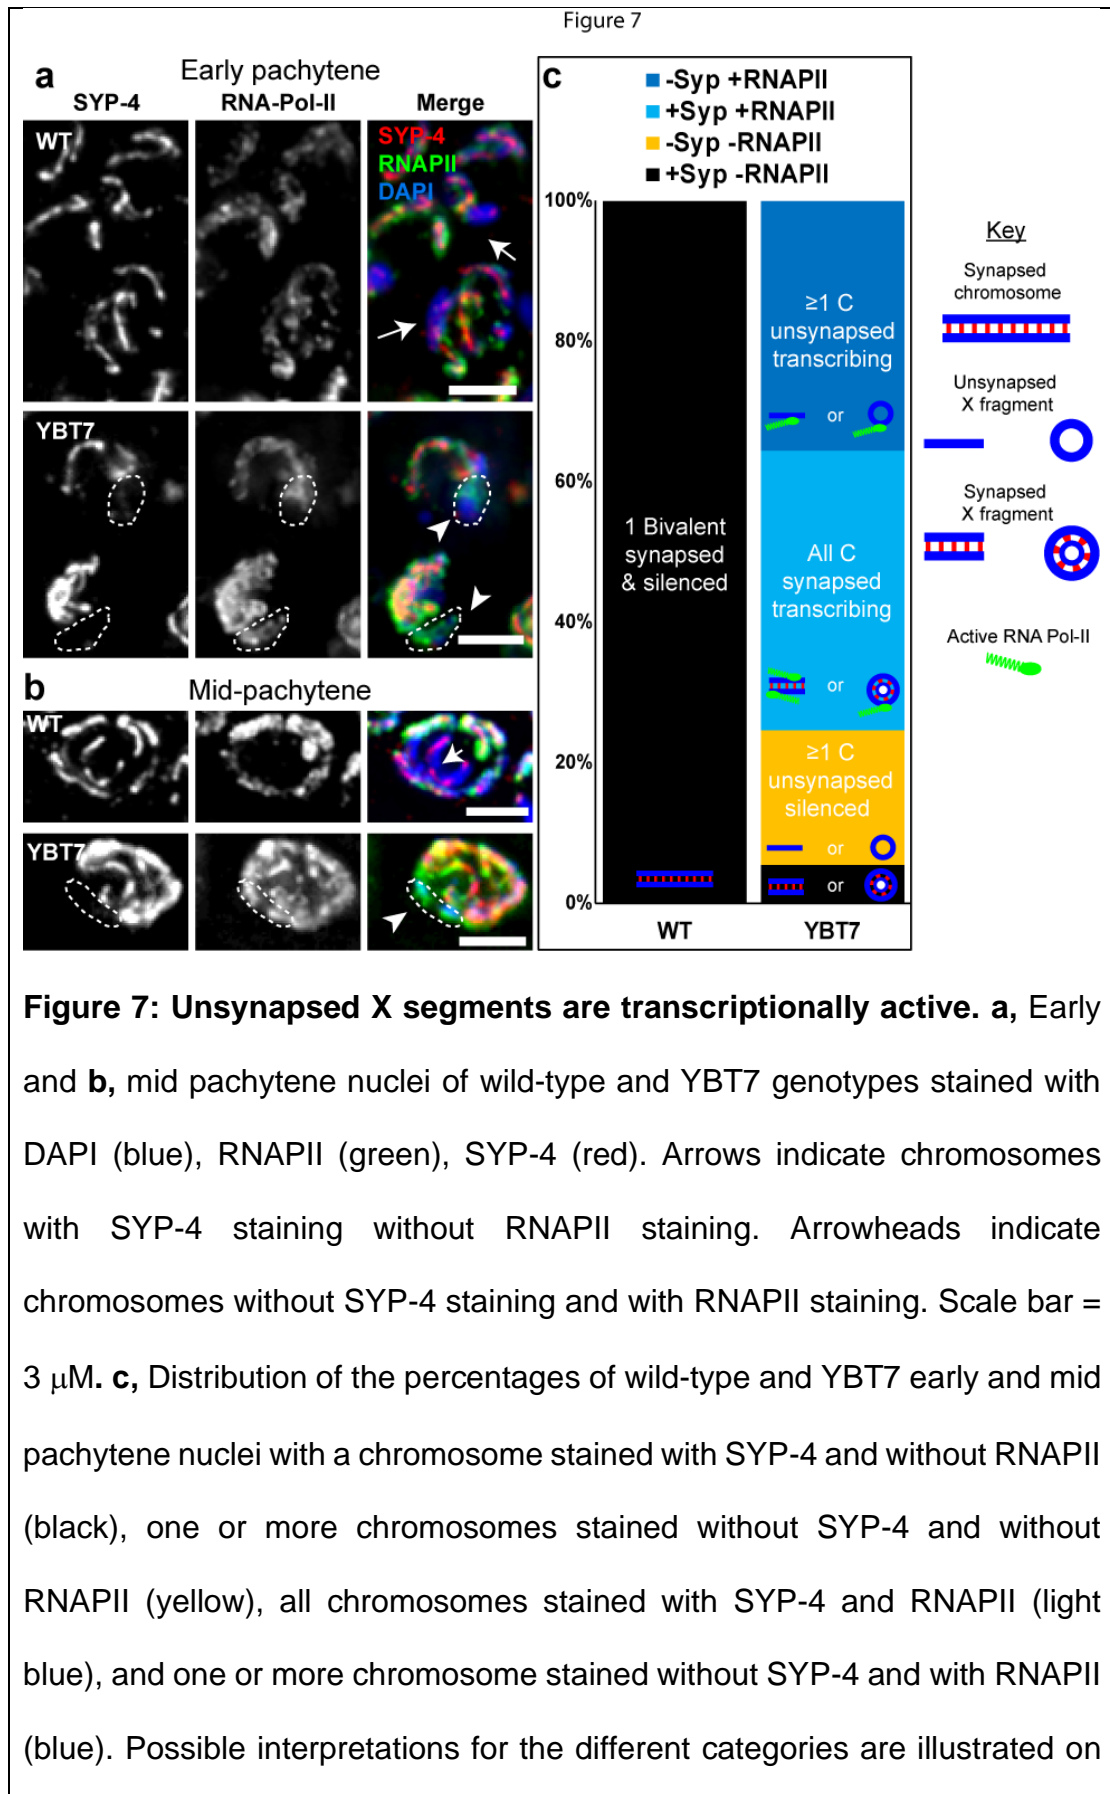

the bars: In WT the synapsed chromosome that does not stain with RNAPII is probably chromosome X, and in YBT7 these are the synapsed fragments (the linear, circular, or both). In YBT7, the chromosomes without SYP-4 and RNAPII (yellow in panel c) are fragments of the X which are not synapsed and are silent. Nuclei which only contain chromosomes with SYP-4 and RNAPII (light blue in panel c) have either lost the circular fragment or both fragments are synapsed and active. The chromosomes that stain with RNAPII but not with SYP-4 (blue in panel c) are probably circular fragments that cannot synapse and that escape both MSCI and MSUC.

447

## 448 **Discussion**

449 Sex chromosomes have emerged several times during animal evolution <sup>78</sup>,  
450 <sup>79</sup> as has MSCI <sup>13-17, 80</sup>. This correlation suggests that evolutionary pressure  
451 drives the silencing of sex chromosomes during meiosis. Since MSUC occurs  
452 in organisms without sex chromosomes, it is conceivable that when sex  
453 chromosomes emerge, they undergo silencing in heterogametic meiocytes  
454 simply because they do not synapse (as was suggested previously <sup>17</sup>).  
455 Supporting this model is the finding in various organisms that there is aberrant  
456 MSCI and synapsis in sex chromosomes that have undergone translocation  
457 with an autosome <sup>34-37</sup>.

458 In this work we tested whether superimposed on the synapsis trigger for  
459 meiotic silencing, there is another mechanism that depends on sex  
460 chromosome integrity. We created strains in which the X chromosome was  
461 broken into segments of similar size. Cytological and quantitative transcriptomic

462 evidence supports our conclusion that there are defects in meiotic silencing in  
463 these broken segments. Although X-linked genes were highly enriched among  
464 the differentially expressed genes in the YBT7 strain, in which the X  
465 chromosome is broken into one linear and one circular fragment, a considerable  
466 number of autosomal genes were also upregulated. Differential expression of  
467 autosomal genes could be due to misregulation of genes on the X chromosome  
468 that directly influence autosomal transcription (e.g., transcription factors and  
469 chromatin modifiers). Although we found genes that fall into this category (e.g.,  
470 *lsd-1* and *atf-5*) in the YBT7 strain, we were not able to link these directly to  
471 upregulated genes on the autosomes. This suggests that a complex network  
472 dysregulated in the mutant results in global alterations in the transcriptome.

473 We also provide evidence that a reciprocal translocation of the X with an  
474 autosome present in SP486 worms leads to defects in MSCI. Kelly et al.  
475 reported that in pachytene nuclei of this strain, a region of a chromosome had  
476 low levels of H3K4me2<sup>26</sup>. We quantified the levels of RNAPII in autosomes and  
477 in the two regions of the X chromosome in early pachytene nuclei and found  
478 that levels of transcription were significantly increased in the X chromosome  
479 regions. This discrepancy could be due to several factors. It is possible that the  
480 X-related segments in SP486 gonads are not enriched with histone  
481 modifications correlated with transcription, even though transcription is  
482 occurring. Alternatively, since Kelly et al. did not use cytological markers to  
483 identify chromosomes, it is possible that the fragments they observed were not  
484 part of the X, but rather an unsynapsed part of chromosome V. We noticed high  
485 variability of the RNAPII staining levels on the X segments in these nuclei, and  
486 only reached our conclusion following careful quantification. This type of

487 variability in MSCI markers of translocated X segments is not limited to *C.*  
488 *elegans*. For example, Turner et al. used  $\gamma$ H2AX as a marker for MSCI initiation  
489 in mouse testes with a reciprocal translocation of chromosomes 16 and X and  
490 found that of 72 pachytene spermatocyte nuclei with synapsed X<sup>16</sup> scored, in  
491 38 nuclei the X part was stained with  $\gamma$ H2AX, and in 34 it was not<sup>37</sup>. Thus, in  
492 the system studied by Turner et al. the X silencing occurs in about 50% of  
493 synapsed X chromosome regions. Similarly, Mary et al. reported that in a boar  
494 with translocation of chromosomes 13 and Y, about 50% of the Y and X  
495 chromosomes showed no  $\gamma$ H2AX signal in pachytene spermatocytes nuclei<sup>38</sup>.  
496 Similar levels were reported by Barasc et al. in a boar with translocation of  
497 chromosomes 1 and Y<sup>35</sup>. These reports indicate that in both worms and  
498 mammals, reciprocal translocation of a sex chromosome to an autosome  
499 incompletely perturbs MSCI. The variability in the silencing observed in  
500 translocations involving sex chromosomes and autosomes could also arise due  
501 to dynamics of epigenetic modifications.

502 Our finding that in some cases the unsynapsed segments of the X  
503 chromosomes were not silenced was surprising given that the accepted model  
504 views the meiotic silencing of sex chromosomes as a special case of the  
505 silencing of unsynapsed chromatin. This uncoupling of synapsis and silencing  
506 of chromatin derived from sex chromosomes may be due to an epigenetic  
507 mechanism. Compared to YBT7, the percentages of nuclei with unsynapsed  
508 and actively transcribed X chromosome fragments were much lower in the other  
509 strains that lost the X integrity (data not shown), and we presume that in these  
510 strains the original “identity” of the chromatin was not faithfully maintained.  
511 Another possibility is that all the fragments were synapsed. It will be important

512 to determine whether this uncoupling of synapsis and expression is unique to  
513 *C. elegans* hermaphrodites in which the X chromosomes do synapse yet still  
514 undergo silencing. Several lines of evidence suggest that this feature is  
515 evolutionarily conserved. First, silencing of unsynapsed chromatin has been  
516 observed in *C. elegans*<sup>32</sup>, so the basic mechanism of MSUC exists. Second,  
517 disruption of sex chromosome integrity in mammals leads to silencing of  
518 synapsed parts of autosomes and sex chromosomes in pachytene<sup>34-36</sup>. Third,  
519 in early pachytene nuclei of XO mice, the unsynapsed X chromosome is  
520 marked by  $\gamma$ H2AX yet is transcribed<sup>30</sup>. Taken together these reports imply that  
521 sex chromosomes undergo silencing in heterogametic wild-type meiocytes not  
522 solely due to their unsynapsed state.

523 Considering these previous reports and the findings we report here, we  
524 propose the following model: Under normal conditions MSCI is activated on  
525 complete sex chromosomes in heterogametic meiocytes, as well as in early  
526 stages of hermaphrodite worms. Lack of synapsis in autosomes leads to  
527 silencing, whereas aberrant synapsis of sex chromosomes cancels their  
528 silencing. When sex chromosomes break, at least in *C. elegans*  
529 hermaphrodites, another mechanism is activated, and the silencing of sex  
530 chromosomes is perturbed. This mechanism can in some meiocytes override  
531 MSUC, and the unsynapsed fragments are transcribed.

532 What evolutionary drive links silencing of sex chromosomes to their  
533 integrity? One possible answer comes from inherent problems with DNA repair  
534 of heterogametic chromosomes during meiosis. As interhomolog recombination  
535 is the preferred repair pathway of meiotic breaks, heterogametic chromosomes  
536 are at risk of aberrant repair and breakage. Therefore, loss of MSCI when sex

537 chromosome integrity is compromised may simply be a safety mechanism that  
538 eliminates meocytes in which the sex chromosomes are fragmented. The  
539 integrity loss will in turn disrupt MSCI, which will lead to gametogenesis failure  
540 and apoptosis. Alternatively, flexibility in the dichotomic chromosome state  
541 between silent sex chromosomes and active autosomal chromosomes may  
542 allow formation and disappearance of sex chromosomes with evolutionary  
543 progression.

544 Like initiation of silencing, other meiotic processes are also executed  
545 differently on the X chromosome than on autosomes in hermaphroditic worms  
546 <sup>81-86</sup>. These differences suggest that the X chromosome is marked differently  
547 than the autosomes, and, indeed, previous reports indicate that the X  
548 chromosomes are enriched with different histone modifications than are  
549 autosomes <sup>26, 32, 81, 82, 87</sup>. Thus, an epigenetic mechanism may regulate silencing  
550 and its dependence on integrity. Our results suggest the possibility that the  
551 silencing initiation depends on an output of sex chromosome that assess  
552 integrity. One potential regulator is the synaptonemal complex. Axis length in  
553 *C. elegans* appears to regulate DNA double-strand break formation and  
554 crossover interference <sup>88, 89</sup>, and axis proteins are in close contact with  
555 chromatin. Additional studies should test these possibilities to determine if  
556 these regulators connect X chromosome integrity to meiotic silencing.

557

558

559

560

561 **Methods**

562 **Strains and alleles**

563 All strains were cultured under standard conditions at 20 °C unless specified  
564 otherwise <sup>90</sup>. The N2 Bristol strain was utilized as the wild-type background.  
565 Worms were grown on NGM plates with *Escherichia coli* OP50 <sup>90</sup>. All  
566 experiments were conducted using adult hermaphrodites 20-24 h after the L4  
567 stage. The following mutations and chromosome rearrangements were used:  
568 SP486: *mnT10 (V;X)* <sup>75</sup>. Strains engineered in this work (see below): YBT7:  
569 *deg-1(huj32) linc-20(huj2) hujCf1*, YBT68: *deg-1(huj33) linc-20(huj29) hujCf2*,  
570 YBT54: *linc-20(huj21)*, YBT67: *deg-1(huj28)*, YBT75: *linc-20(huj29)* and  
571 YBT72: *deg-1(huj32) linc-20(huj2)*.

572

573 **Generation of strains by CRISPR-Cas9 genome engineering**

574 To generate the YBT7 strain, we used the procedure described in <sup>91</sup> with  
575 the modifications detailed previously <sup>50</sup>. The gRNA sequences are given in  
576 Table S3. Worms were isolated based on PCR analysis of targeted loci, and  
577 broken chromosomes were identified via Nanopore sequencing as described  
578 below. The YBT7 strain carries the deletions *deg-1(huj32) X:7769748-7772344*  
579 and *linc-20(huj2) X:16508000-16509415* and *X:16511093-16513798*. A fusion  
580 of the region *X:~7772k to X:~16511k* and fusion of the segment left of *X:7774k*  
581 to segment right of *16507k* were confirmed by Sanger sequencing. Illumina  
582 DNA sequencing indicated that there are other structural aberrations and  
583 mutations, but these were not confirmed by Sanger sequencing.

584 All other strains were generated using the protocol described previously <sup>73</sup>  
585 with the modifications detailed previously <sup>50</sup>. YBT68: *deg-1(huj33) linc-*

586 *20(huj29) hujCf2* was generated using crispr RNAs (crRNAs) listed in Table S3,  
587 isolated in a similar strategy to YBT7, and outcrossed five times. This strain  
588 carries the deletions *deg-1(huj33)* X:7769768-X:7769760, *linc-20(huj29)*  
589 X:16507326-16508724 and X:16509401-16510374. Nanopore sequencing  
590 suggested that the right and the left halves of the X are not connected, and  
591 cytological observation supported this hypothesis. Illumina DNA sequencing  
592 suggested the presence of other structural aberrations and mutations, but these  
593 were not confirmed by Sanger sequencing.

594 YBT54: *linc-2(huj21)* was generated using crRNAs listed in Table S3 and  
595 was outcrossed five times. This strain carries the deletion *linc-20(huj21)*  
596 X:16507934-16509755. YBT67: *deg-1(huj28)* was engineered using crRNAs  
597 listed in Table S3. It has a 4-base out-of-frame deletion at position 297 of the  
598 first exon. YBT75: *linc-20(huj29)* was engineered using appropriate crRNAs  
599 and single-stranded oligodeoxynucleotides (ssODNs) (Table S3). These were  
600 injected into YBT68 worms, and repair of the *deg-1* genotype was verified by  
601 sequencing.

602 YBT72 was engineered through three CRISPR engineering steps as  
603 follows: Wild-type worms were engineered using crRNAs “homologous lincs 5’  
604 crRNA” and “homologous lincs 3’ crRNAs” together with the ssODN “Linc-20  
605 del1-ssODN” and “Linc-20 del2-ssODN”. The strain with *linc-20 (huj21)* was  
606 identified by PCR and verified by sequencing. After one outcross with the wild-  
607 type strain, worms were further engineered with “Linc-20 YBT7 del-2 5’ crRNA”  
608 and “Linc-20 YBT7 del-2 3’ crRNA” together with “Linc-20 del2-ssODN”, and  
609 worms with *linc-20(huj2)* were identified by PCR and verified by sequencing  
610 and outcrossed once with the wild-type strain. A strain with *deg-1(huj32)* was



611 engineered by injecting wild-type worms with crRNAs “Deg-1 YBT7 del- 5’  
612 crRNA” and “Deg-1 YBT7 del- 3’ crRNA” and ssODN “Deg-1 del-ssODN” (Table  
613 S3) and outcrossed once. Worms with *deg-1(huj32)* were crossed with worms  
614 with *huj(2)* to establish YBT72. All the engineered mutations were verified by  
615 Sanger sequencing.

616

### 617 **Cytological analysis and immunostaining**

618 DAPI and immunostaining of dissected gonads were carried out as  
619 described<sup>61, 92</sup>. Worms were permeabilized on Superfrost+ slides for 2 min with  
620 methanol at -20 °C and fixed for 30 min in 4% paraformaldehyde in phosphate-  
621 buffered saline (PBS). Staining with 500 ng/ml DAPI was carried out for 10 min,  
622 followed by destaining in PBS containing 0.1% Tween 20 (PBST). Slides were  
623 mounted with Vectashield anti-fading medium (Vector Laboratories). Primary  
624 antibodies were used at the following dilutions: rabbit anti-SYP-4 (1:200, a kind  
625 gift from S. Smolikove, The University of Iowa), rabbit anti-HIM-8 (Novus  
626 Biological, 1:2000), rat anti-HIM-8 (1:100, a kind gift from A. Dernburg,  
627 University of California, Berkeley), rabbit anti-H3K27me3 (Millipore, 1:1000),  
628 rabbit anti-H3K4me2 (Millipore, 1:1000), and mouse anti-pSer2 RNAPII  
629 (Diagenode, 1:1000). The secondary antibodies used were Cy2-donkey anti-  
630 rabbit, Cy3-donkey anti-goat, Cy2-goat anti-rat, Cy2-goat anti-mouse, Cy3-goat  
631 anti-mouse (Jackson ImmunoResearch Laboratories).

632

### 633 **DNA FISH**

634 Probes were made from cosmids provided by the *C. elegans* sequencing  
635 consortium at the Sanger Centre. Cosmid DNAs that harbor 30-40 kb of

636 sequence around the chosen genomic target were labeled after linearization by  
637 nick translation using cy3dUTP (GE Healthcare) as described<sup>93</sup>. For the region  
638 left of *linc-20* we used C09G1, and for the right side of the X chromosome we  
639 used T27B1.

640 Worms were transferred to a 15- $\mu$ L drop of egg buffer (118 mM NaCl, 48  
641 mM KCl, 2 mM CaCl<sub>2</sub>, 2 mM MgCl<sub>2</sub>, 5 mM HEPES [pH 7.4])<sup>94</sup>, containing 15  
642 mM NaN<sub>3</sub> and 0.1% Tween-20 on a 22x22 mm coverslip. Gonads were  
643 dissected and fixed in 3.7% formaldehyde in PBST. A SuperFrost Plus slide  
644 (ThermoFisher Scientific) was placed on the coverslip, then frozen on an  
645 aluminum block immersed in liquid nitrogen. The coverslip was cracked off and  
646 slides were transferred to methanol at -20 °C for 30 min. Slides were washed  
647 in 2X SSCT (3 M NaCl, 0.3 M sodium citrate, pH 7, 0.1% Tween20), 25%  
648 formamide/2X SSCT and incubated for 4 h at 37 °C in 50% formamide/2X  
649 SSCT in a humid chamber. Slides were prehybridized on a heat block at 93 °C  
650 for 90 s in hybridization solution (50% formamide, 3x SSC, 10% dextran sulfate)  
651 containing 1  $\mu$ l of the labeled probe. Slides were hybridized overnight in a humid  
652 chamber at 37 °C. After washing with 2X SSCT, the slides were either directly  
653 labeled with DAPI and mounted in Vectashield solution for visualization or were  
654 blocked 30 min at room temperature in 1% BSA before antibody labeling.

655

## 656 **Imaging and microscopy**

657 Z-stack 3D images shown in Figure 2 were acquired at 0.3  $\mu$ m increments  
658 using an Olympus FV1000 Inverted Confocal IX81 Microscope and FV10-ASW  
659 3.1 Software (Olympus). All other images were acquired using the Olympus  
660 IX83 fluorescence microscope system. Optical Z-sections were collected at

661 0.30- or 0.60- $\mu$ m increments with the Hamamatsu Orca Flash 4.0 v3 and  
662 CellSens Dimension imaging software (Olympus). Pictures were deconvolved  
663 using AutoQuant X3 (Media Cybernetics).

664

### 665 **Progeny and embryonic lethality quantification**

666 Brood sizes and embryonic lethality were determined by placing individual  
667 L4 worms on seeded NGM plates, transferring each worm to a new plate every  
668 24 h, and counting embryos and hatched progeny during a 3-day period.

669

### 670 **Analysis of synapsis and expression interactions**

671 Early and mid-pachytene nuclei stained with DAPI, anti-SYP-4, and anti  
672 pSer2 RNAPII were captured at 0.3  $\mu$ m optic Z intervals. Nuclei were binned  
673 into one of four categories: 1) at least one chromosome positive for RNAPII and  
674 negative for SYP-4, 2) all chromosomes positive for both markers, 3) all SYP-  
675 4-negative chromosomes are also negative for RNAPII, and 4) all  
676 chromosomes are SYP-4 positive and at least one is RNAPII negative.

677

### 678 **RNA-seq**

679 Gonads were manually dissected from worms at 24 h post L4 and  
680 immediately placed in Eppendorf tubes with Trizol reagent. After several freeze-  
681 crack cycles in liquid nitrogen, total RNA was extracted using Zymo Research  
682 Direct-zol RNA miniprep plus kit. Synthesis of first strand was done on 10  $\mu$ g of  
683 total RNA using ThermoFisher SuperScript III Reverse Transcriptase with the  
684 following primer that includes the T7 promotor, a unique molecular identifier,  
685 UMI and polyT: 5'-

686 CGATGACGTAATACGACTCACTATAGGGATACCACCATGGCTCTTTC  
687 CCTACACGACGCTCTTCCGATCTNNNNNNNNNTTTTTTTTTTTTTTTTTT  
688 TVN-3'. Removal of excess primers was done using New England Biolabs  
689 Exonuclease I and ThermoFisher FastDigest HinfI in provided buffers; samples  
690 were incubated 45 min at 37 °C and then 10 min at 80 °C. The product was  
691 purified using Beckman AMPure XP magnetic beads, eluted in 14.5 µL of 10  
692 mM Tris, followed by second-strand cDNA synthesis using New England  
693 Biolabs NEBNext Ultra II Non-Directional RNA Second Strand Synthesis  
694 Module. Samples were concentrated to 8 µL, and then the product was  
695 transcribed with the New England Biolabs HiScribe T7 High Yield RNA  
696 Synthesis Kit. RNA was purified using AMPure XP beads and eluted in 20 µL  
697 of 10 mM Tris. A 9-µL aliquot of RNA was fragmented using Invitrogen RNA  
698 Fragmentation Reagents kit for 3 min. Fragments were purified using AMPure  
699 XP beads and eluted in 11 µL Tris. Synthesis of first-strand cDNA and was  
700 performed using ThermoFisher SuperScript III Reverse Transcriptase using  
701 PvG748 primer 5'-AGACGTGTGCTCTTCCGATCTNNNNNN-3'. After  
702 purification using AMPure XP beads and elution with 12.5 µL 10 mM Tris,  
703 libraries were amplified using Kapa Biosystems HiFi HotStart ReadyMix, with  
704 2p fixed primers (2p Fixed, 5'-  
705 AATGATACGGCGACCACCGAGATCTACACTCTTCCCTACACGACGCTC  
706 TTCCGATCT-3' and 2p Fixed +barcode, 5'-  
707 CAAGCAGAAGACGGCATAACGAGATNNNNNNNGTGACTGGAGTTCAGA  
708 CGTGTGCTCTTCCGATCT-3'). The product was purified using AMPure XP  
709 beads and eluted in 32 µL of doubly distilled water. Deep sequencing was

710 carried out on an Illumina NextSeq following the manufacturer's protocols; >38  
711 million reads were generated for each sample.

712

### 713 **Differential expression analysis**

714 Raw reads were trimmed off low quality and technical bases. Cutadapt,  
715 version 1.12, with parameters -O 1, -m 15 and --use-reads-wildcards. Reads  
716 with overall low quality were removed using fastq\_quality\_filter, FASTX version  
717 0.0.14, with parameters -q 20 and -p 90. Processed reads were aligned to the  
718 *C. elegans* genome version WBcel235 using TopHat2, version 2.1.1. Alignment  
719 allowed 2 mismatches and 5-base gaps, and used gene annotations from  
720 Ensembl release 36. Raw counts per gene were calculated with htseq-count,  
721 version 0.6.0, using default parameters.

722 Normalization and differential expression were calculated with the R  
723 package DESeq2, version 1.12.4. Calculations were done for genes with at  
724 least 3 raw counts using default parameters. Genes were taken as differentially  
725 expressed if their baseMean was above 5 and if the absolute maximum  
726 likelihood estimate of the fold change (without shrinkage, lfcMLE) was greater  
727 than  $5/\text{baseMean}^{0.5} + 1$ . This baseMean-dependent threshold for the change  
728 in expression required at least 2-fold change in expression for highly expressed  
729 genes, and the requirement becomes stricter as the level expression becomes  
730 lower. The MA plot is illustrated in Fig. S1.

731

### 732 **Nanopore DNA sequencing**

733 Worms were washed from NGM plates with M9 buffer, and young adult  
734 worms were isolated on a 60% sucrose bed. Worms were then washed in M9

735 buffer and frozen in liquid nitrogen. DNA was isolated using Zymo Research  
736 Quick-DNA Miniprep kit.

737 Genomic DNA was barcoded without fragmentation using Oxford Nanopore  
738 Technologies EXP-NBD103, SQK-LSK108/9 according to the vendor's  
739 instructions. Approximately 260 ng DNA of each strain were loaded two in a cell  
740 couples on one MinION flowcell (Oxford Nanopore Technologies), and  
741 sequencing was performed using GridION device and MinKnow software for 48  
742 h.

743 using command line Guppy (version 3.4.4), and reads were quality filtered  
744 using NanoFilt (version 2.6.0, parameters '-q 5 -l 100 --headcrop 40'). Filtered  
745 reads were aligned to the *C. elegans* genome (WBcel235) using minimap2  
746 (version 2.17<sup>95</sup>). A combination of three tools were used for identification of  
747 structural variations: sniffles (version 1.0.11 , <sup>96</sup>), NanoSV (version 1.2.3, <sup>97</sup>),  
748 and SVIM (version 1.2.0, <sup>98</sup>). Copy number variations were identified using the  
749 R package QDNAseq <sup>99</sup>.

750

### 751 **Illumina DNA sequencing**

752 DNA was extracted from 25  $\mu$ L of packed young adult worms using Gentra  
753 Puregene Tissue Kit (Qiagen) according to vendor protocol for *C. elegans*. For  
754 each sample, 1000 ng of DNA was sheared using the Covaris E220X sonicator.  
755 End repair was performed in an 80- $\mu$ L reaction at 20 °C for 30 min. After  
756 purification using AMPURE XP beads in a ratio of 0.75X beads to DNA volume,  
757 A bases were added to both 3' ends followed by adapter ligation in a final  
758 concentration of 0.125  $\mu$ M. A solid-phase reversible immobilization (SPRI) bead  
759 cleanup in a ratio of 0.75x beads to DNA volume was performed, followed by

760 eight PCR cycles using 2X KAPA HiFi ready mix in a total volume of 25  $\mu$ L with  
761 the following program: 2 min at 98 °C, 8 cycles of 20 s at 98 °C, 30 s at 55 °C,  
762 60 s at 72 °C, and 10 min at 72 °C.

763 Libraries were evaluated by Qubit and TapeStation. Sequencing libraries  
764 were constructed with barcodes to allow multiplexing of four samples on one  
765 lane. Between 38-45 million paired-end 150-bp reads were sequenced on  
766 Illumina Nextseq 500 instrument Mid output 300 cycles kit.

767 Reads were mapped to the *C. elegans* genome (Ensembl's WBcel235)  
768 using bwa-0.7.5a<sup>100</sup> mem algorithm and then deduplicated using Picard tools  
769 v.2.8.1. Variant calling was done with GATK's Haplotype caller v3.7<sup>101</sup>.  
770 Variants were filtered with the following values for single-nucleotide  
771 polymorphisms and indels, respectively: QD<2.0, FS>60.0, MQ<40.0,  
772 HaplotypeScore>13.0, MQRankSum<-12.5, ReadPosRankSum<-8.0 and  
773 QD<2.0, FS>200.0 and ReadPosRankSum<-20.0. Variants were then  
774 annotated with Ensembl's Variant Effect Predictor v.83<sup>102</sup>.

775

### 776 **Measuring distances between chromosome markers**

777 To measure the spatial distance between chromosomal makers, mid-  
778 pachytene nuclei positively stained for DAPI and HIM-8 and with the FISH  
779 probe were completely captured at 0.3  $\mu$ m Z increments. The distance between  
780 the HIM-8 foci and the FISH probe was measured using ImageJ. Significance  
781 was estimated via the Mann-Whitney test.

782

### 783 **Relative staining intensity of expression markers of X chromosome vs.** 784 **autosomes**

785 To measure the level of expression marker staining, early pachytene nuclei  
786 positively stained for DAPI and H3K27me3, H3K4me2, or pSer2 RNAPII were  
787 captured. The staining level on the X chromosome (marked by either HIM-8 or  
788 the FISH probe directed to the right side of the X) was measured in ImageJ, as  
789 well on another chromosome within the same nucleus. The ratio for each  
790 nucleus was calculated and averaged across all nuclei.

791

### 792 **Availability of data and materials**

793 Strains and plasmids are available upon request. Table S3 contains detailed  
794 descriptions of all primers used for genome engineering and genotyping.

795

### 796 **Acknowledgments**

797 We thank the Caenorhabditis Genetics Center for kindly providing strains.  
798 We thank Abby Dernburg for the HIM-8 antibody and Sarit Smolikove for the  
799 SYP-4 antibody. We thank Yuval Nevo and the team at the Info-CORE,  
800 Bioinformatics Unit of the I-CORE Computation Center, The Hebrew University  
801 and Hadassah Medical Center, Jerusalem, Israel, for the differential expression  
802 analysis. We thank Michal Bronstein and the team at the Center for Genomic  
803 Technologies of the Alexander Silberman Life Sciences Institute for their help  
804 with Nanopore sequencing. We thank Michael Gershovis and the team of Israel  
805 National Center for Personalized Medicine for their help in Illumina DNA  
806 genomic sequencing. This work was supported by the European Research  
807 Council (ERC, #715260 SC-EpiCode), the Israeli Center of Research



808 Excellence (I-CORE) program, the Israel Science Foundation (ISF, #1618/16),  
809 and Azriely Foundation Scholar Program for Distinguished Junior Faculty to  
810 O.R. and by the Israel Science Foundation (grants #1283/15 and #2090/15) to  
811 Y.B.T.

812

### 813 **References**

- 814 1. Couteau, F., Goodyer, W. & Zetka, M. Finding and keeping your partner during  
815 meiosis. *Cell Cycle* **3**, 1014-1016 (2004).
- 816 2. Gerton, J.L. & Hawley, R.S. Homologous chromosome interactions in meiosis:  
817 diversity amidst conservation. *Nat Rev Genet* **6**, 477-487 (2005).
- 818 3. Gray, S. & Cohen, P.E. Control of Meiotic Crossovers: From Double-Strand Break  
819 Formation to Designation. *Annu Rev Genet* **50**, 175-210 (2016).
- 820 4. Jasin, M. & Rothstein, R. Repair of strand breaks by homologous recombination.  
821 *Cold Spring Harbor perspectives in biology* **5**, a012740 (2013).
- 822 5. Mezard, C., Jahns, M.T. & Grelon, M. Where to cross? New insights into the  
823 location of meiotic crossovers. *Trends Genet* **31**, 393-401 (2015).
- 824 6. Page, S.L. & Hawley, R.S. The genetics and molecular biology of the  
825 synaptonemal complex. *Annu Rev Cell Dev Biol* **20**, 525-558 (2004).
- 826 7. Rog, O. & Dernburg, A.F. Chromosome pairing and synapsis during  
827 *Caenorhabditis elegans* meiosis. *Curr Opin Cell Biol* **25**, 349-356 (2013).
- 828 8. Woglar, A. & Jantsch, V. Chromosome movement in meiosis I prophase of  
829 *Caenorhabditis elegans*. *Chromosoma* **123**, 15-24 (2014).
- 830 9. Yu, Z., Kim, Y. & Dernburg, A.F. Meiotic recombination and the crossover  
831 assurance checkpoint in *Caenorhabditis elegans*. *Seminars in cell &*  
832 *developmental biology* **54**, 106-116 (2016).
- 833 10. Zetka, M. Homologue pairing, recombination and segregation in *Caenorhabditis*  
834 *elegans*. *Genome Dyn* **5**, 43-55 (2009).
- 835 11. Zetka, M. & Rose, A. The genetics of meiosis in *Caenorhabditis elegans*. *Trends*  
836 *Genet* **11**, 27-31 (1995).
- 837 12. Hillers, K.J., Jantsch, V., Martinez-Perez, E. & Yanowitz, J.L. Meiosis. *WormBook*,  
838 1-43 (2017).

- 839 13. Checchi, P.M. & Engebrecht, J. Heteromorphic sex chromosomes: navigating  
840 meiosis without a homologous partner. *Molecular reproduction and development*  
841 **78**, 623-632 (2011).
- 842 14. Strome, S., Kelly, W.G., Ercan, S. & Lieb, J.D. Regulation of the X chromosomes  
843 in *Caenorhabditis elegans*. *Cold Spring Harbor perspectives in biology* **6** (2014).
- 844 15. Maine, E.M. Meiotic silencing in *Caenorhabditis elegans*. *International review of*  
845 *cell and molecular biology* **282**, 91-134 (2010).
- 846 16. Vibranovski, M.D. Meiotic sex chromosome inactivation in *Drosophila*. *Journal of*  
847 *genomics* **2**, 104-117 (2014).
- 848 17. Turner, J.M. Meiotic Silencing in Mammals. *Annu Rev Genet* **49**, 395-412 (2015).
- 849 18. Carofiglio, F. *et al.* SPO11-independent DNA repair foci and their role in meiotic  
850 silencing. *PLoS Genet* **9**, e1003538 (2013).
- 851 19. Becherel, O.J. *et al.* Senataxin plays an essential role with DNA damage response  
852 proteins in meiotic recombination and gene silencing. *PLoS Genet* **9**, e1003435  
853 (2013).
- 854 20. Broering, T.J. *et al.* BRCA1 establishes DNA damage signaling and pericentric  
855 heterochromatin of the X chromosome in male meiosis. *J Cell Biol* **205**, 663-675  
856 (2014).
- 857 21. Ellnati, E. *et al.* DNA damage response protein TOPBP1 regulates X chromosome  
858 silencing in the mammalian germ line. *Proc Natl Acad Sci U S A* **114**, 12536-12541  
859 (2017).
- 860 22. Ichijima, Y. *et al.* MDC1 directs chromosome-wide silencing of the sex  
861 chromosomes in male germ cells. *Genes Dev* **25**, 959-971 (2011).
- 862 23. Hirota, T. *et al.* SETDB1 Links the Meiotic DNA Damage Response to Sex  
863 Chromosome Silencing in Mice. *Dev Cell* **47**, 645-659 e646 (2018).
- 864 24. Kouznetsova, A. *et al.* BRCA1-mediated chromatin silencing is limited to oocytes  
865 with a small number of asynapsed chromosomes. *J Cell Sci* **122**, 2446-2452  
866 (2009).
- 867 25. Mahadevaiah, S.K. *et al.* Extensive meiotic asynapsis in mice antagonises meiotic  
868 silencing of unsynapsed chromatin and consequently disrupts meiotic sex  
869 chromosome inactivation. *J Cell Biol* **182**, 263-276 (2008).
- 870 26. Kelly, W.G. *et al.* X-chromosome silencing in the germline of *C. elegans*.  
871 *Development* **129**, 479-492 (2002).
- 872 27. Tzur, Y.B. *et al.* Spatiotemporal Gene Expression Analysis of the *Caenorhabditis*  
873 *elegans* Germline Uncovers a Syncytial Expression Switch. *Genetics* **210**, 587-  
874 605 (2018).

- 875 28. Bender, L.B. *et al.* MES-4: an autosome-associated histone methyltransferase  
876 that participates in silencing the X chromosomes in the *C. elegans* germ line.  
877 *Development* **133**, 3907-3917 (2006).
- 878 29. Ebbing, A. *et al.* Spatial Transcriptomics of *C. elegans* Males and Hermaphrodites  
879 Identifies Sex-Specific Differences in Gene Expression Patterns. *Dev Cell* **47**,  
880 801-813 e806 (2018).
- 881 30. Turner, J.M. *et al.* Silencing of unsynapsed meiotic chromosomes in the mouse.  
882 *Nat Genet* **37**, 41-47 (2005).
- 883 31. Shiu, P.K., Raju, N.B., Zickler, D. & Metzberg, R.L. Meiotic silencing by  
884 unpaired DNA. *Cell* **107**, 905-916 (2001).
- 885 32. Bean, C.J., Schaner, C.E. & Kelly, W.G. Meiotic pairing and imprinted X chromatin  
886 assembly in *Caenorhabditis elegans*. *Nat Genet* **36**, 100-105 (2004).
- 887 33. Royo, H. *et al.* Evidence that meiotic sex chromosome inactivation is essential for  
888 male fertility. *Curr Biol* **20**, 2117-2123 (2010).
- 889 34. Pinton, A. *et al.* Meiotic studies in an azoospermic boar carrying a Y;14  
890 translocation. *Cytogenet Genome Res* **120**, 106-111 (2008).
- 891 35. Barasc, H. *et al.* Y-autosome translocation interferes with meiotic sex inactivation  
892 and expression of autosomal genes: a case study in the pig. *Sexual development*  
893 : *genetics, molecular biology, evolution, endocrinology, embryology, and*  
894 *pathology of sex determination and differentiation* **6**, 143-150 (2012).
- 895 36. Vozdova, M. *et al.* Meiotic behaviour of evolutionary sex-autosome translocations  
896 in Bovidae. *Chromosome Res* **24**, 325-338 (2016).
- 897 37. Turner, J.M., Mahadevaiah, S.K., Ellis, P.J., Mitchell, M.J. & Burgoyne, P.S.  
898 Pachytene asynapsis drives meiotic sex chromosome inactivation and leads to  
899 substantial postmeiotic repression in spermatids. *Dev Cell* **10**, 521-529 (2006).
- 900 38. Mary, N. *et al.* Meiotic Synapsis and Gene Expression Altered by a Balanced Y-  
901 Autosome Reciprocal Translocation in an Azoospermic Pig. *Sexual development*  
902 : *genetics, molecular biology, evolution, endocrinology, embryology, and*  
903 *pathology of sex determination and differentiation* **12** (2018).
- 904 39. Moller, H.D. *et al.* CRISPR-C: circularization of genes and chromosome by  
905 CRISPR in human cells. *Nucleic Acids Res* **46**, e131 (2018).
- 906 40. Chen, X. *et al.* Targeted Chromosomal Rearrangements via Combinatorial Use of  
907 CRISPR/Cas9 and Cre/LoxP Technologies in *Caenorhabditis elegans*. *G3* **8**,  
908 2697-2707 (2018).
- 909 41. Chen, X., Li, M., Feng, X. & Guang, S. Targeted Chromosomal Translocations  
910 and Essential Gene Knockout Using CRISPR/Cas9 Technology in *Caenorhabditis*  
911 *elegans*. *Genetics* **201**, 1295-1306 (2015).

- 912 42. Cullot, G. *et al.* CRISPR-Cas9 genome editing induces megabase-scale  
913 chromosomal truncations. *Nature communications* **10**, 1136 (2019).
- 914 43. Owens, D.D.G. *et al.* Microhomologies are prevalent at Cas9-induced larger  
915 deletions. *Nucleic Acids Res* **47**, 7402-7417 (2019).
- 916 44. Essletzbichler, P. *et al.* Megabase-scale deletion using CRISPR/Cas9 to generate  
917 a fully haploid human cell line. *Genome Res* **24**, 2059-2065 (2014).
- 918 45. Korablev, A.N., Serova, I.A. & Serov, O.L. Generation of megabase-scale  
919 deletions, inversions and duplications involving the Contactin-6 gene in mice by  
920 CRISPR/Cas9 technology. *BMC Genet* **18**, 112 (2017).
- 921 46. Guilherme, R.S. *et al.* Mechanisms of ring chromosome formation, ring instability  
922 and clinical consequences. *BMC Med Genet* **12**, 171 (2011).
- 923 47. Takagaki, N. *et al.* The mechanoreceptor DEG-1 regulates cold tolerance in  
924 *Caenorhabditis elegans*. *EMBO Rep* **21**, e48671 (2020).
- 925 48. Wang, Y. *et al.* A glial DEG/ENaC channel functions with neuronal channel DEG-  
926 1 to mediate specific sensory functions in *C. elegans*. *EMBO J* **27**, 2388-2399  
927 (2008).
- 928 49. Ishtayeh, H. *et al.* Systematic Analysis of the Meiotic Functions of Long Intergenic  
929 Non-Coding RNAs in  
930 *C. elegans*. *RNA biology* **In preparation** (2020).
- 931 50. Achache, H. *et al.* Progression of Meiosis Is Coordinated by the Level and  
932 Location of MAPK Activation Via OGR-2 in *Caenorhabditis elegans*. *Genetics* **212**,  
933 213-229 (2019).
- 934 51. Friedland, A.E. *et al.* Heritable genome editing in *C. elegans* via a CRISPR-Cas9  
935 system. *Nat Methods* **10**, 741-743 (2013).
- 936 52. Phillips, C.M. *et al.* HIM-8 binds to the X chromosome pairing center and mediates  
937 chromosome-specific meiotic synapsis. *Cell* **123**, 1051-1063 (2005).
- 938 53. Paulsen, T., Kumar, P., Koseoglu, M.M. & Dutta, A. Discoveries of  
939 Extrachromosomal Circles of DNA in Normal and Tumor Cells. *Trends Genet* **34**,  
940 270-278 (2018).
- 941 54. Diag, A., Schilling, M., Klironomos, F., Ayoub, S. & Rajewsky, N. Spatiotemporal  
942 m(i)RNA Architecture and 3' UTR Regulation in the *C. elegans* Germline. *Dev Cell*  
943 **47**, 785-800 e788 (2018).
- 944 55. Bender, L.B., Cao, R., Zhang, Y. & Strome, S. The MES-2/MES-3/MES-6 complex  
945 and regulation of histone H3 methylation in *C. elegans*. *Curr Biol* **14**, 1639-1643  
946 (2004).

- 947 56. Reuben, M. & Lin, R. Germline X chromosomes exhibit contrasting patterns of  
948 histone H3 methylation in *Caenorhabditis elegans*. *Dev Biol* **245**, 71-82 (2002).
- 949 57. Seydoux, G. & Dunn, M.A. Transcriptionally repressed germ cells lack a  
950 subpopulation of phosphorylated RNA polymerase II in early embryos of  
951 *Caenorhabditis elegans* and *Drosophila melanogaster*. *Development* **124**, 2191-  
952 2201 (1997).
- 953 58. Kim, E., Du, L., Bregman, D.B. & Warren, S.L. Splicing factors associate with  
954 hyperphosphorylated RNA polymerase II in the absence of pre-mRNA. *Journal of*  
955 *Cell Biology* **136**, 19-28 (1997).
- 956 59. Nusch, M. & Eckmann, C.R. Translational control in the *Caenorhabditis elegans*  
957 germ line. *Advances in experimental medicine and biology* **757**, 205-247 (2013).
- 958 60. Hodgkin, J., Horvitz, H.R. & Brenner, S. Nondisjunction Mutants of the Nematode  
959 *CAENORHABDITIS ELEGANS*. *Genetics* **91**, 67-94 (1979).
- 960 61. Colaiacovo, M.P. *et al.* Synaptonemal complex assembly in *C. elegans* is  
961 dispensable for loading strand-exchange proteins but critical for proper  
962 completion of recombination. *Dev Cell* **5**, 463-474 (2003).
- 963 62. Alpi, A., Pasierbek, P., Gartner, A. & Loidl, J. Genetic and cytological  
964 characterization of the recombination protein RAD-51 in *Caenorhabditis elegans*.  
965 *Chromosoma* **112**, 6-16 (2003).
- 966 63. Rinaldo, C., Bazzicalupo, P., Ederle, S., Hilliard, M. & La Volpe, A. Roles for  
967 *Caenorhabditis elegans* rad-51 in meiosis and in resistance to ionizing radiation  
968 during development. *Genetics* **160**, 471-479 (2002).
- 969 64. Adamo, A. *et al.* BRC-1 acts in the inter-sister pathway of meiotic double-strand  
970 break repair. *EMBO Rep* **9**, 287-292 (2008).
- 971 65. Smolikov, S. *et al.* Synapsis-defective mutants reveal a correlation between  
972 chromosome conformation and the mode of double-strand break repair during  
973 *Caenorhabditis elegans* meiosis. *Genetics* **176**, 2027-2033 (2007).
- 974 66. Tzur, Y.B. *et al.* Heritable Custom Genomic Modifications in *Caenorhabditis*  
975 *elegans* via a CRISPR-Cas9 System. *Genetics* **195**, 1181-1185 (2013).
- 976 67. Chiu, H., Schwartz, H.T., Antoshechkin, I. & Sternberg, P.W. Transgene-Free  
977 Genome Editing in *Caenorhabditis elegans* Using CRISPR-Cas. *Genetics* **195**,  
978 1167-1171 (2013).
- 979 68. Cho, S.W., Kim, S., Kim, J.M. & Kim, J.S. Targeted genome engineering in human  
980 cells with the Cas9 RNA-guided endonuclease. *Nature biotechnology* **31**, 230-232  
981 (2013).

- 982 69. Dickinson, D.J., Ward, J.D., Reiner, D.J. & Goldstein, B. Engineering the  
983 *Caenorhabditis elegans* genome using Cas9-triggered homologous  
984 recombination. *Nat Methods* **10**, 1028-1034 (2013).
- 985 70. Farboud, B. & Meyer, B.J. Dramatic enhancement of genome editing by  
986 CRISPR/Cas9 through improved guide RNA design. *Genetics* **199**, 959-971  
987 (2015).
- 988 71. Katic, I. & Grosshans, H. Targeted Heritable Mutation and Gene Conversion by  
989 Cas9-CRISPR in *Caenorhabditis elegans*. *Genetics* **195**, 1173-1176 (2013).
- 990 72. Lo, T.W. *et al.* Precise and heritable genome editing in evolutionarily diverse  
991 nematodes using TALENs and CRISPR/Cas9 to engineer insertions and  
992 deletions. *Genetics* **195**, 331-348 (2013).
- 993 73. Paix, A., Folkmann, A., Rasoloson, D. & Seydoux, G. High Efficiency, Homology-  
994 Directed Genome Editing in *Caenorhabditis elegans* Using CRISPR/Cas9  
995 Ribonucleoprotein Complexes. *Genetics* (2015).
- 996 74. Paix, A. *et al.* Scalable and Versatile Genome Editing Using Linear DNAs with  
997 Microhomology to Cas9 Sites in *Caenorhabditis elegans*. *Genetics* **198**, 1347-  
998 1356 (2014).
- 999 75. Herman, R.K., Kari, C.K. & Hartman, P.S. Dominant X-chromosome  
1000 nondisjunction mutants of *Caenorhabditis elegans*. *Genetics* **102**, 379-400 (1982).
- 1001 76. MacQueen, A.J. *et al.* Chromosome sites play dual roles to establish homologous  
1002 synapsis during meiosis in *C. elegans*. *Cell* **123**, 1037-1050 (2005).
- 1003 77. Smolikov, S., Schild-Prufert, K. & Colaiacovo, M.P. A yeast two-hybrid screen for  
1004 SYP-3 interactors identifies SYP-4, a component required for synaptonemal  
1005 complex assembly and chiasma formation in *Caenorhabditis elegans* meiosis.  
1006 *PLoS Genet* **5**, e1000669 (2009).
- 1007 78. Li, X.Y. & Gui, J.F. Diverse and variable sex determination mechanisms in  
1008 vertebrates. *Science China. Life sciences* **61**, 1503-1514 (2018).
- 1009 79. Wilson Sayres, M.A. Genetic Diversity on the Sex Chromosomes. *Genome*  
1010 *biology and evolution* **10**, 1064-1078 (2018).
- 1011 80. Richardson, L.A. Sex Chromosomes Do It Differently. *PLoS Biol* **14**, e2001096  
1012 (2016).
- 1013 81. McClendon, T.B. *et al.* X Chromosome Crossover Formation and Genome  
1014 Stability in *Caenorhabditis elegans* Are Independently Regulated by *xnd-1*. *G3* **6**,  
1015 3913-3925 (2016).
- 1016 82. Wagner, C.R., Kuervers, L., Baillie, D.L. & Yanowitz, J.L. *xnd-1* regulates the  
1017 global recombination landscape in *Caenorhabditis elegans*. *Nature* **467**, 839-843  
1018 (2010).

- 1019 83. Jaramillo-Lambert, A., Ellefson, M., Villeneuve, A.M. & Engebrecht, J. Differential  
1020 timing of S phases, X chromosome replication, and meiotic prophase in the *C.*  
1021 *elegans* germ line. *Dev Biol* **308**, 206-221 (2007).
- 1022 84. Lamelza, P. & Bhalla, N. Histone methyltransferases MES-4 and MET-1 promote  
1023 meiotic checkpoint activation in *Caenorhabditis elegans*. *PLoS Genet* **8**,  
1024 e1003089 (2012).
- 1025 85. Meneely, P.M., Farago, A.F. & Kauffman, T.M. Crossover distribution and high  
1026 interference for both the X chromosome and an autosome during oogenesis and  
1027 spermatogenesis in *Caenorhabditis elegans*. *Genetics* **162**, 1169-1177 (2002).
- 1028 86. Mlynarczyk-Evans, S. & Villeneuve, A.M. Time-Course Analysis of Early Meiotic  
1029 Prophase Events Informs Mechanisms of Homolog Pairing and Synapsis in  
1030 *Caenorhabditis elegans*. *Genetics* **207**, 103-114 (2017).
- 1031 87. Guo, Y., Yang, B., Li, Y., Xu, X. & Maine, E.M. Enrichment of H3K9me2 on  
1032 Unsynapsed Chromatin in *Caenorhabditis elegans* Does Not Target de Novo  
1033 Sites. *G3* **5**, 1865-1878 (2015).
- 1034 88. Libuda, D.E., Uzawa, S., Meyer, B.J. & Villeneuve, A.M. Meiotic chromosome  
1035 structures constrain and respond to designation of crossover sites. *Nature* **502**,  
1036 703-706 (2013).
- 1037 89. Mets, D.G. & Meyer, B.J. Condensins regulate meiotic DNA break distribution,  
1038 thus crossover frequency, by controlling chromosome structure. *Cell* **139**, 73-86  
1039 (2009).
- 1040 90. Brenner, S. The genetics of *Caenorhabditis elegans*. *Genetics* **77**, 71-94 (1974).
- 1041 91. Friedland, A.E. *et al.* Heritable genome editing in *C. elegans* via a CRISPR-Cas9  
1042 system. *Nat Methods* (2013).
- 1043 92. Saito, T.T., Youds, J.L., Boulton, S.J. & Colaiacovo, M.P. *Caenorhabditis elegans*  
1044 HIM-18/SLX-4 interacts with SLX-1 and XPF-1 and maintains genomic integrity in  
1045 the germline by processing recombination intermediates. *PLoS Genet* **5**,  
1046 e1000735 (2009).
- 1047 93. Lanctot, C. & Meister, P. Microscopic analysis of chromatin localization and  
1048 dynamics in *C. elegans*. *Methods in molecular biology* **1042**, 153-172 (2013).
- 1049 94. Edgar, L.G. Blastomere culture and analysis. *Methods Cell Biol* **48**, 303-321  
1050 (1995).
- 1051 95. Li, H. Minimap2: pairwise alignment for nucleotide sequences. *Bioinformatics* **34**,  
1052 3094-3100 (2018).
- 1053 96. Sedlazeck, F.J. *et al.* Accurate detection of complex structural variations using  
1054 single-molecule sequencing. *Nat Methods* **15**, 461-468 (2018).

- 1055 97. Cretu Stancu, M. *et al.* Mapping and phasing of structural variation in patient  
1056 genomes using nanopore sequencing. *Nature communications* **8**, 1326 (2017).
- 1057 98. Heller, D. & Vingron, M. SVIM: structural variant identification using mapped long  
1058 reads. *Bioinformatics* **35**, 2907-2915 (2019).
- 1059 99. Scheinin, I. *et al.* DNA copy number analysis of fresh and formalin-fixed  
1060 specimens by shallow whole-genome sequencing with identification and exclusion  
1061 of problematic regions in the genome assembly. *Genome Res* **24**, 2022-2032  
1062 (2014).
- 1063 100. Li, H. *et al.* The Sequence Alignment/Map format and SAMtools. *Bioinformatics*  
1064 **25**, 2078-2079 (2009).
- 1065 101. Poplin, R. *et al.* A universal SNP and small-indel variant caller using deep neural  
1066 networks. *Nature biotechnology* **36**, 983-987 (2018).
- 1067 102. McLaren, W. *et al.* The Ensembl Variant Effect Predictor. *Genome Biol* **17**, 122  
1068 (2016).

1069

## 1070 **Figure legends**

1071 **Figure 1 Engineering of worm strains with broken X chromosomes. a,**  
1072 Illustration of the X chromosome in a wild-type worm and the fragments  
1073 resulting from Cas9-mediated cleavage in YBT7 worms. The gRNA binding  
1074 sites (black scissors) and cytological markers (green and red) used in analyses  
1075 of X chromosome fragmentation are indicated. **b,** Pachytene nuclei stained with  
1076 DAPI (blue), HIM-8 (green), and left *linc-20* FISH probe (red). **c,** Quantification  
1077 of the distance between HIM-8 and the site left of *linc-20*. **d,** Pachytene nuclei  
1078 stained with DAPI (blue), HIM-8 (green), and FISH probe complementary to the  
1079 right end of the X chromosome (red). **e,** Quantification of the distance between  
1080 HIM-8 and the site on the right end of chromosome X. **f,** Late pachytene nuclei  
1081 stained with DAPI (blue) and the FISH probe marking a site left of *linc-20* (red).  
1082 FISH signal associated with a circular chromosome is marked with an  
1083 arrowhead.  $n \geq 80$ . \*\*\*\*  $p < 0.0001$ , Mann-Whitney test. Scale bars = 3  $\mu$ M.



1084 **Figure 2: Active transcription marks are associated with the left fragment**  
1085 **of the X chromosome in YBT7. a**, Early pachytene nuclei stained with DAPI  
1086 (blue), HIM-8 (green), and antibody against H3K27me3 (red). **b**, Average of the  
1087 relative H3K27me3 signal per wild-type and YBT7 nucleus on a HIM-8-marked  
1088 body vs. an autosome. **c**, Early pachytene nuclei stained with DAPI (blue), HIM-  
1089 8 (green), and antibody against H3K4me2 (red). **d**, Average of the relative  
1090 H3K4me2 signal per wild-type and YBT7 nucleus on a HIM-8-marked body vs.  
1091 an autosome. **e**, Early pachytene nuclei stained with DAPI (blue), HIM-8  
1092 (green), and antibody against RNAPII. **f**, Average of the relative RNAPII signal  
1093 per wild-type and YBT7 nucleus on a HIM-8-marked body vs. an autosome.  
1094  $n \geq 10$ . \*\*  $p < 0.01$ , \*\*\*\*  $p < 0.0001$ , Mann-Whitney test. Scale bar = 3  $\mu\text{M}$ .

1095 **Figure 3: Genes along the entire X chromosome are upregulated in YBT7**  
1096 **gonads**. Plotted is  $\log_2$  of the fold-change maximum likelihood estimate  
1097 (lfcMLE) of YBT7 vs. wild type for each gene along the wild-type X  
1098 chromosome. Only highly differentially expressed genes are illustrated.  
1099 Alignments of the linear (green) and circular (orange) fragments of YBT7 are  
1100 shown schematically below the graph.

1101 **Figure 4: Meiotic defects are present in YBT7. a**, Average brood and, **b**,  
1102 embryonic lethality levels for wild-type and YBT7 progeny.  $n \geq 18$ . **c**, Mature wild-  
1103 type and YBT7 oocytes stained with DAPI. Arrow indicates a chromosome  
1104 aggregation. Arrowheads indicate chromosomal fragments. **d**, Percentages of  
1105 DAPI stained bodies (excluding fragments) in wild-type and YBT7 oocytes.  
1106  $n \geq 23$ . **e**, Average RAD-51 foci per nucleus at different oogonial stages.  $n \geq 23$ .  
1107 Scale bar = 1  $\mu\text{M}$ . \*\*  $p < 0.01$ , \*\*\*  $p < 0.001$ , \*\*\*\*  $p < 0.0001$ , Mann-Whitney test.

1108 **Figure 5: Broken X chromosomes lead to defects in MSCI and meiosis. a,**  
1109 Illustration of the X chromosomes in the wild-type and YBT68 strains. Sites of  
1110 gRNAs (black scissors) and cytological markers (green and red) in the wild-type  
1111 and YBT68 are marked. **b,** Pachytene nuclei stained with DAPI (blue), HIM-8  
1112 (green), and FISH probe directed to the right end of the X chromosome (red).  
1113 Arrow indicates hybridization of both probes on the same chromosome.  
1114 Arrowheads indicate probe hybridization on different chromosomes. Scale bar  
1115 = 3  $\mu$ M. **c,** Quantification of the distance between HIM-8 and the FISH probe in  
1116 wild-type and YBT68 pachytene nuclei. **d,** Mature wild-type and YBT68 oocytes  
1117 stained with DAPI. Scale bar = 1  $\mu$ M. **e,** Distribution of the numbers of DAPI-  
1118 stained bodies in wild-type and YBT68 oocytes.  $n \geq 10$ . **f,** Average brood size  
1119 and, **g,** embryonic lethality of wild-type and YBT68 broods. **h,** Early pachytene  
1120 nuclei from wild-type and YBT68 gonads stained with DAPI (blue), HIM-8  
1121 (green), and RNAPII (red). Scale bar = 3  $\mu$ M. Arrows indicate HIM-8-marked  
1122 chromosome with no RNAPII staining. Arrowheads indicate HIM-8-marked  
1123 chromosome with significant RNAPII staining. **i,** Average of the relative RNAPII  
1124 staining levels per wild-type and YBT68 nucleus on the HIM-8-marked body vs.  
1125 an autosome. \*  $p < 0.05$ , \*\*  $p < 0.01$ , \*\*\*\*  $p < 0.0001$ , Mann-Whitney test.

1126 **Figure 6: Reciprocal translocation of X and V chromosomes causes**  
1127 **defects in MSCI and meiosis. a,** Early pachytene nuclei stained with DAPI  
1128 (blue), RNAPII (red), and HIM-8 (green). Scale bar = 3  $\mu$ M. **c,** Early pachytene  
1129 nuclei stained with DAPI (blue), RNAPII (green), and FISH probe to the right  
1130 side of the X (red). Scale bar = 3  $\mu$ M. **b, d,** Average of the relative RNAPII on  
1131 the X segment vs an autosome within the same nucleus of **a** and **c** respectively.

1132 Arrows: chromosomes with no RNAPII staining. Arrowheads: chromosomes  
1133 with significant RNAPII staining.  $n=20$ . \*\*\*\*  $p<0.0001$ , Mann-Whitney test.

1134 **Figure 7: Unsynapsed X segments are transcriptionally active.** **a**, Early and  
1135 **b**, mid pachytene nuclei of wild-type and YBT7 genotypes stained with DAPI  
1136 (blue), RNAPII (green), SYP-4 (red). Arrows indicate chromosomes with SYP-  
1137 4 staining without RNAPII staining. Arrowheads indicate chromosomes without  
1138 SYP-4 staining and with RNAPII staining. Scale bar = 3  $\mu$ M. **c**, Distribution of  
1139 the percentages of wild-type and YBT7 early and mid pachytene nuclei with a  
1140 chromosome stained with SYP-4 and without RNAPII (black), one or more  
1141 chromosomes stained without SYP-4 and without RNAPII (yellow), all  
1142 chromosomes stained with SYP-4 and RNAPII (light blue), and one or more  
1143 chromosome stained without SYP-4 and with RNAPII (blue). Possible  
1144 interpretations for the different categories are illustrated on the bars: In WT the  
1145 synapsed chromosome that does not stain with RNAPII is probably  
1146 chromosome X, and in YBT7 these are the synapsed fragments (the linear,  
1147 circular, or both). In YBT7, the chromosomes without SYP-4 and RNAPII  
1148 (yellow in panel c) are fragments of the X which are not synapsed and are silent.  
1149 Nuclei which only contain chromosomes with SYP-4 and RNAPII (light blue in  
1150 panel c) have either lost the circular fragment or both fragments are synapsed  
1151 and active. The chromosomes that stain with RNAPII but not with SYP-4 (blue  
1152 in panel c) are probably circular fragments that cannot synapse and that escape  
1153 both MSCI and MSUC.

1154

1155

1156 **Supplementary**

1157 **File S1: Nanopore data demonstrating fragmentation of the X**  
1158 **chromosomes in YBT7 and YBT68 strains.**

1159 **Figure S1: Differential gene expression in YBT7 and wild-type gonads.**

1160 Expression differences in YBT7 vs. wild-type gonads for each gene plotted  
1161 against the average expression. The X axis is the DESeq2-calculated  
1162 baseMean, and the Y axis is the DESeq2-calculated lfcMLE (log2 of the fold-  
1163 change maximum likelihood estimate). Orange dots indicate differentially  
1164 expressed genes, other genes are indicated as black dots. The Y axis was  
1165 limited to a range between -6 and 6; triangles represent genes with lfcMLE  
1166 value beyond this range.

1167 **Figure S2: Meiotic defects in YBT7 are the result of the chromosome**

1168 **breaks and not local changes. a**, Average progeny brood size per worm and,  
1169 **b**, embryonic lethality of wild type vs *deg-1(huj28)* (disruption within *deg-1*,  
1170  $n \geq 8$ ). **c**, Average progeny brood size per worm and, **d**, embryonic lethality of  
1171 wild type vs *linc-20(huj21)* (full deletion of *linc-20*,  $n=7$ ). **e**, Average progeny  
1172 brood size per worm and, **f**, embryonic lethality of wild type vs YBT72 (deletions  
1173 within *deg-1* and *linc-20*, identical to YBT7,  $n=10$ ). **g**, Average progeny brood  
1174 size per worm and, **h**, embryonic lethality of wild type vs YBT75 (YBT68 with  
1175 reconstructed WT *deg-1*,  $n \geq 6$ ). \*  $p < 0.05$ , \*\*  $p < 0.01$ , N.S. indicates not  
1176 significant, Mann-Whitney test.

1177 **Table S1: Differential expression in YBT7 versus wild-type gonads.**

1178 Columns include general gene details (A-F), raw counts for each strain (G and  
1179 H), normalized counts (I and J), the DESeq2 calculated baseMean (K), the

1180 DESeq2 calculated lfcMLE (L), and a column for the final decision of differential  
1181 expression (M). Genes with less than 3 counts are indicated with question  
1182 marks in columns I to M. There is a question mark in the general gene details  
1183 when information was missing from the database. The final decision column  
1184 (M) has the value 'THR' for differentially expressed genes (i.e., those with a  
1185 baseMean greater than 5 and a lfcMLE greater than  $5/\text{baseMean}^{0.5} + 1$ ) and  
1186 a value 'FALSE' for all other genes.

1187 **Table S2: Point mutations in YBT7 and YBT68.** Homozygous mutations  
1188 detected by Illumina sequencing in YBT7 and YBT68 but not in the parental  
1189 wild-type strain.

1190 **Table S3: List of gRNAs, crRNAs, and ssODNs used for genome**  
1191 **engineering.**

1192

1193

1194

1195
